# Supplementary material
Source: ML conference proceedings conference paper supplement (https://proceedings.neurips.cc/paper_files/paper/2023/hash/6445dd88ebb9a6a3afa0b126ad87fe41-Abstract.html)
Supplement: Supplementary file 1 [file 6445dd88ebb9a6a3afa0b126ad87fe41-Supplemental-Conference.pdf]

```

1 select_airport_cities(city_road_cost, city_airport_cost): given a matrix representing the
  ↳ cost of building a road between any two cities, and a list representing the cost of
  ↳ building an airport in a city (where any two cities with airports are connected), return
  ↳ a list of the cities that should have airports built in them to minimize the total cost
  ↳ of building roads and airports such that all cities are connected. The list should be
  ↳ sorted in ascending order.
2 [[0,3,3],[3,0,3],[3,3,0]], [0,0,0] -> [0,1,2]
3 [[0,3,3],[3,0,3],[3,3,0]], [10,10,10] -> []
4 [[0,10,3],[10,0,11],[3,11,0]], [1,4,5] -> [0,1]
5 sky_city_cost(city_road_cost, city_airport_cost): given a list of lists representing the
  ↳ cost of building a road between any two cities, and a list representing the cost of
  ↳ building an airport in a city, return a new cost matrix with a new node corresponding
  ↳ to the sky.
6 [[1,2,3],[1,2,3],[1,2,3]], [4,5,6] -> [[1,2,3,4],[1,2,3,5],[1,2,3,6],[4,5,6,0]]
7 minimum_spanning_tree(cost_matrix): given a list of lists representing the cost of each
  ↳ edge, return an adjacency matrix corresponding to the minimum spanning tree.
8 [[0,1,3,4],[1,0,2,100],[3,2,0,5],[4,100,5,0]] ->
  ↳ [[0,1,0,1],[1,0,1,0],[0,1,0,0],[1,0,0,0]]
9 final_node_connectors(adjacency_matrix): given a list of lists representing an adjacency
  ↳ matrix, return a list of the nodes connected to the final node. However, if only one
  ↳ node is connected to the final node, return an empty list.
10 [[0,1,0,1],[1,0,1,0],[0,1,0,0],[1,0,0,0]] -> []
11 [[0,1,0,1],[1,0,1,0],[0,1,0,1],[1,0,1,0]] -> [0,2]

```

Figure A.9: A potential programming assignment focused on problem-solving rather than implementation. The top-level function and asserts would be the assigned problem (which Codex [12] does not seem to be able to solve directly), while the other functions would be the student solution.

## 550 A Implications

551 Parsel is a natural language compiler framework that bridges the gap between natural language  
552 and programming language by allowing programmers to write high-level algorithmic designs in  
553 natural language and automatically compiling them into valid code. This has potential benefits for  
554 programmers, students, and code language models.

### 555 A.1 For Programmers

#### 556 A.1.1 Current Limitations

557 First, programming generation language models like Codex continue to be constrained primarily to  
558 individual functions, rarely exceeding a few dozen lines in practice [12, 58]. This is still a dramatic  
559 shift from foundational earlier works, which focused on the association between one line of natural  
560 language pseudocode with one line of code [33] or a line of text to a StackOverflow snippet [66]. Yet,  
561 these models perform worse the more unusual the desired functions are, and recent research suggests  
562 that people using these language models are more likely to introduce buggy code [47], although this  
563 is not yet conclusive [53].

#### 564 A.1.2 Potential Benefits

565 On the other hand, results from Google and others indicate that professionals can write code more  
566 efficiently with large language models, and the benefits will likely only improve as they improve [58].  
567 Since Parsel requires constraints that ensure functions behave as expected, this should encourage  
568 bug-free programs and avoid the need for manually checking that specific underlying functions are  
569 correct. Furthermore, a function written in Parsel is likely to be more resilient to breaking changes in  
570 the target language, especially syntactic changes (e.g. Python2 to Python3). In addition, a natural  
571 extension would draw on work on automatic unit testing [17] to suggest additional constraints where  
572 behavior is ambiguous between implementations of a function.

## 573 A.2 For Students

### 574 A.2.1 Current Limitations

575 In addition, these language models pose serious challenges for programming pedagogy – existing  
576 introductory programming classes rely extensively on teaching syntax and how to implement algo-  
577 rithms over how to solve problems with them. Free language model-based tools like Copilot can  
578 essentially solve many of these introductory assignments directly, function by function. Those which  
579 cannot be solved currently will be increasingly solved [18].

### 580 A.2.2 Potential Benefits

581 Many students currently introduced to programming struggle with learning syntax and debugging  
582 unclear compiler or interpreter errors. However, abstracting away these details with a natural-language  
583 coding language will likely make learning to code more accessible to students who are just beginning  
584 to code. In addition, stepping away from implementation-focused assignments will allow a focus on  
585 higher-level problem-solving assignments earlier. These will allow for assignments that are more  
586 like those in mathematics. For example, for a problem like Figure A.9, instead of choosing between  
587 requiring students to manually implement a problem-solving focused question like the top-level  
588 description of, or requiring teaching assistants to manually evaluate the reasoning for correctness,  
589 one could ask them to implement a solution in Parsel.

## 590 A.3 For Code Language Models

### 591 A.3.1 Current Limitations

592 Traditional programming languages result in some unique challenges for language models. For  
593 example, unlike natural languages, traditional programming languages are far less robust to slight  
594 variations in wording. In addition, traditional programming languages require many tokens for  
595 syntactic details and in some cases, may take many lines to express what can be expressed far more  
596 simply in language. For example, referring to a shortest-path algorithm or Conway’s game of life takes  
597 far fewer tokens than actually implementing them. However, even with fairly nonstandard problems,  
598 LLMs have shown remarkable algorithmic generalization ability [36, 62, 3, 72]. One alternative  
599 that has been explored is conversational code generation [40, 67]. However, these approaches have  
600 primarily focused on highly imperative programming structures. Moreover, they still require having  
601 the full program in context and do not clearly generalize to complex hierarchical programs with many  
602 functions.

### 603 A.3.2 Potential Benefits

604 Parsel allows code language models to stay closer to natural language when generating code, which  
605 corresponds more closely to their primary source of training data. Moreover, it allows complex  
606 but standard methods to be described concisely, requiring fewer tokens to generate. One exciting  
607 additional benefit is the potential to generate solutions recursively: if the Parsel compiler is unable to  
608 find a solution for a set of functions, it should be possible to prompt the model to define new helper  
609 functions. In fact, we find that often the model attempts to reference undefined auxiliary functions  
610 when defining complex functions (e.g. “count\_living\_neighbors(grid, i, j)” in Conway’s game of life),  
611 and as a result support an optional argument where the model can attempt to resolve NameErrors  
612 automatically by attempting to implement functions.

## 613 B Limitations

614 There are several limitations to the current implementation of Parsel. First, Parsel relies on a code  
615 LLM to generate implementations of individual functions, and the quality of these implementations  
616 can vary depending on the specific model used and the complexity of the function descriptions. In  
617 particular, Parsel may struggle to generate correct code for individual functions with complex behavior  
618 (i.e. functions that Codex cannot implement). However, this can be mitigated by decomposing the  
619 complex functions into simpler ones that can be implemented more easily.

620 The current implementation of Parsel may struggle to generate correct code when there are many  
621 functions with complex dependencies or without constraints. This is because the number of im-  
622 plementation combinations to consider grows exponentially with the size of the largest strongly  
623 connected components. As discussed, this can limit Parsel’s performance on some programs. How-  
624 ever, approaches like Chen et al. [11] may be able to mitigate this.

625 Code LLMs, unfortunately, do not perform well on languages underrepresented in their training data –  
626 with few examples to learn from, LLMs may struggle to generate correct code in these languages  
627 [5]. However, some LLMs can learn new languages in context, allowing them to generate code in  
628 languages not in their training data [5]. These limitations can impact the quality and reliability of  
629 the code generated with Parsel. In addition, because code LLMs have never been trained on Parsel,  
630 this harms their ability to generate it. While we could wait for Parsel to gain widespread adoption, it  
631 should also be possible to translate many existing codebases to Parsel. We include a proof-of-concept  
632 backtranslation/decompilation study in Appendix K.

633 In addition, the best open-source code LLMs currently available e.g. PolyCoder [62] substantially  
634 underperform Codex, while Codex is competitive with other traditional LLMs on reasoning tasks [36].  
635 However, this dependence on closed models creates a vulnerability, as the providers of closed LLMs  
636 can change behavior (e.g. rate limits or model implementations) without warning. Indeed, between  
637 the time we started working on Parsel and this version of the paper, OpenAI ended widespread access  
638 to Codex, now available only by request.

639 Because of this, we evaluated a 2.7B CodeGen model from Nijkamp et al. [39] with Parsel in the  
640 same configuration we used when evaluating APPS on Codex (in the 8x16 configuration). We found  
641 that it could solve none of the random 25 problems which we evaluated it on. However, despite these  
642 limitations, the current Parsel implementation has shown promising results in generating correct code  
643 for a variety of functions and languages. Many limitations will likely be ameliorated as code LLMs  
644 improve.

## 645 C Future Work

646 In the future, we hope to more deeply integrate automatic unit test generation, especially in com-  
647 bination with user-provided tests [17, 11]. One method would be to identify edge cases and check  
648 whether the set of functions that successfully solve all existing tests disagree on any new tests. This  
649 could permit automatic decomposition without exponential growth in implementation combinations.  
650 Techniques like those proposed in Zhang et al. [69], which would allow us to rerank a set of solutions,  
651 could also allow us to search the combinatorial space of solutions more quickly. Relatedly, for the  
652 robotic task planning, incorporating asserts at the execution level (e.g. checking whether the agent  
653 is close to the microwave, as in Singh et al. [56]) is a promising research direction. Furthermore,  
654 evaluating the examples in this paper, we found that using the minimum CodeT score across all  
655 generated functions was a consistently effective heuristic to identify good sets of functions. However,  
656 generating unit tests for all functions when generating Parsel programs instead of generating unit  
657 tests for a shared top-level function increases the inference cost from linear in the number of tasks to  
658 also being linear in the number of functions and Parsel programs generated. Finding a way to balance  
659 this tradeoff would likely be valuable.

660 In addition, we plan to incorporate ways of varying the “confidence threshold” of the language model.  
661 Ensuring that the descriptions are straightforward and unambiguous is important for more critical  
662 programs and parts of programs. In addition, when teaching students simpler concepts, requiring  
663 them to decompose the task further may be useful.

664 We would like to integrate value functions to allow decomposition to be done more methodically  
665 where no verification is possible. Specifically, automatically decomposing all functions that have  
666 not yet been implemented in an SCC is suboptimal and could be improved with a model of expected  
667 improvement due to expansion, as done for proof expansion in Polu and Sutskever [49]. In addition,  
668 when decomposing functions, we would like to permit the model to reference already-defined  
669 functions (rather than to just define new ones). We might even use the code language model to  
670 determine which function to evaluate next. Further, we aim to support more general reward functions  
671 for function implementations where multiple may be valid but we rank implementations based on  
672 a desired feature. These “soft” constraints may also allow new Parsel uses, e.g. planning stories in  
673 natural language [64].

```

1 and_commute(p q: Prop): the and operator is
  ↳ commutative
2 show (p ∧ q → q ∧ p) ∧ (q ∧ p → p ∧ q)
3 p_q_implies_q_p(p q: Prop): if p ∧ q, then q
  ↳ ∧ p
4 q_p_implies_p_q(p q: Prop): if q ∧ p, then p
  ↳ ∧ q

1 -- if p ∧ q, then q ∧ p
2 lemma p_q_implies_q_p(p q: Prop):
3   p ∧ q → q ∧ p :=
4   begin
5     intro h,
6     cases h with hp hq,
7     split,
8     exact hq,
9     exact hp,
10  end
11 -- Description: if p ∨ q, then q
12   ↳ ∨ p
13 -- if q ∧ p, then p ∧ q
14 lemma q_p_implies_p_q(p q: Prop):
15   (q ∧ p) → (p ∧ q) :=
16   begin
17     intro h,
18     split,
19     exact h.right,
20     exact h.left,
21  end
22

23 /-
24   Theorem:
25   If q ∧ p, then p ∧ q
26 -/
27 -- the and operator is commutative
28 lemma and_commute(p q: Prop):
29   (p ∧ q → q ∧ p) ∧ (q ∧ p →
30     ↳ p ∧ q) :=
31   begin
32     apply and.intro,
33     { apply p_q_implies_q_p },
34     { apply q_p_implies_p_q }
35   end
36
37
38
39
40
41
42
43
44

```

Figure A.10: Parsel to Lean (theorem proving)

674 Finally, we hope it would be possible to use Parsel as a framework for bootstrapping increasingly  
675 complex program generation (e.g. Anthony et al. [4], Zelikman et al. [68], Odena et al. [43]). That is,  
676 by 1) generating Parsel examples from a purely natural language specification and then reinforcing  
677 those which successfully compile, and 2) by reinforcing the model with each successfully compiled  
678 component, we would likely be able to iteratively improve performance with an arbitrarily large  
679 dataset of examples.

680 Another feature that would be valuable would be the ability to incorporate multiple base tools with  
681 different kinds of specialized models, inspired by Ibarz et al. [29] and Dohan et al. [20]. That is, it  
682 would be valuable to allow a model to determine which target language to use, possibly combining  
683 them. For example, for large parts of the Tensorflow and PyTorch libraries, while their interfaces  
684 are written in Python, they depend heavily on large C++ codebases [46, 1]. Relatedly, Cobbe et al.  
685 [15] showed that giving language models access to a calculator allowed them to solve more complex  
686 math word problems. This, combined with the observation that Parsel could also compile programs  
687 by generating language model prompts to be used as part of the program, may potentially allow the  
688 automatic generation of task-specific language model cascades [20].

689 Another noteworthy addition would be the integration of Synchronesh [48], ensuring that each new  
690 word or token generated by the model is actually possible within the grammar of the given formal  
691 language and does not violate other semantic constraints.

692 Ultimately, we hope that this specification for Parsel is a jumping-off point for a new way of thinking  
693 about programming and reasoning.

## 694 D Theorem Proving in Lean

695 With the same framework, we can generate proofs in formal theorem-proving languages such as Lean,  
696 as in Figure A.10. We include the translated version in the appendix. Note a nuance of Lean and  
697 theorem-proving languages is that the ability to run Lean on proof with no errors/warnings indicates  
698 the proof is correct (but is not a guarantee that the proof statement matches our claim in language).  
699 Thus, each function in a Lean Parsel proof has an “implicit constraint.” This makes it straightforward  
700 to identify which informal parts of a proof are most difficult to explicate. Generally, we believe Parsel  
701 can be a powerful tool for theorem proving.

702 Yet, we observed important challenges in this context, which we believe are avenues for future work  
703 and can be resolved. For example, in datasets such as MiniF2F [70], many proofs require explicit  
704 calculations in intermediate steps. That is, many proofs are similar to “Find the minimum value of  
705  $\frac{9x^2 \sin^2 x + 4}{x \sin x}$  for  $0 < x < \pi$ . Show that it is 012.” (from the informal MiniF2F introduced by Jiang  
706 et al. [30]). We believe that a dataset of proof statements (in natural and formal language), requiring  
707 complex proofs that are more abstract and less dependent on explicit calculations would allow us to  
708 better measure progress towards solving difficult theorems – we leave this to future work.

```

1 parsel(program, target_language): synthesize a program from a string specifying a Parsel program.
2   parse_program(program): parse the Parsel program string to a call graph
3     create_root_node(): create a root node as the current function node, without any constraints
4     parse_line(line, current_node, current_indent) -> function_graph: for each step up in indentation, set the current node
      ↳ to its parents. then, parse the definition, reference, or constraint.
5     parse_definition(line): create a new function node, make it a child of the current node's parent, then assign it as
      ↳ current node.
6     parse_reference(line): add reference as a child of current node if reference is an ancestor or a direct child of an
      ↳ ancestor
7     parse_constraint(line): add the constraint to the current node's constraints.
8   get_dependency_graph(function_graph) -> dependency_graph: taking the function graph, create a copy where all nodes without
      ↳ asserts also depend on their parents unless the target language implicitly tests all functions.
9   identify_strongly_connected_components(dependency_graph): return SCCs of the dependency graph and the edges between the
      ↳ SCCs.
10  synthesize_scc(scc, scc_graph): find an implementation string solving a given SCC, starting with SCC dependencies, then
      ↳ generating possible implementations of SCC functions, then finding an implementation combination satisfying the
      ↳ functions' constraints
11  synthesize_children(scc, scc_graph): synthesize any SCCs this SCC depends on and add them to the implementation string.
12  synthesize_scc
13  generate_implementations(scc, n, children_implementation_str): for each function in the SCC, prompt the language model to
      ↳ generate n implementations of each function starting with the implementation string of the SCC's children.
14  solve_constraints(scc, fn_implementations): taking the provided constraints of each function in the scc, evaluate a
      ↳ shuffled list of the direct product of implementations with the constraints until one passes all of them
15  direct_product_implementations(fn_implementations): return the direct product of the list of lists of
      ↳ fn_implementations
16  generate_constraints(fn_node): translate each of the constraints into an evaluation string idiomatic to the target
      ↳ language and add these to the list of combined implementations
17  eval_str(scc, implementation_str): evaluate an implementation including constraints by running it in a target-language
      ↳ executor
18  on_fail(scc, scc_graph): raise an error highlighting the scc which could not be synthesized

```

Figure A.11: Pseudocode in the style of Parsel describing how Parsel synthesizes programs. A detailed version including automatic decomposition and automatic infilling is in Figure A.12 of Appendix F. Constraints are left out for clarity – e.g. one could define a test function and validate the compilability (or lack thereof) of a set of reference Parsel programs.

## E Optimizations

### E.1 Caching

We cache responses from the language model with respect to the prompt and language model decoding parameters 1) to reduce the number of queries necessary and 2) to keep the programs generated mostly stable (i.e. a working function should continue working unless it or its children change). To this end, when the number of desired implementations increases for a pre-existing query with all other arguments fixed (temperature, number of decoding tokens, etc), we append the additional ones to those already generated.

### E.2 Automatic Function Infilling

Sometimes, a function generated by a language model may call a function that is not yet implemented. In this case, we can (optionally) attempt to automatically generate and implement it based on its usage. The function is then incorporated into the call graph as a unit-test-less child of the function which calls it. To avoid infinite recursion and inefficient use of language model quota, we limit the number of times that this process can be applied to a function.

### E.3 Multiprocessing

We use multiprocessing with a user-specified timeout to test many implementation sets in parallel to allow for many fast solutions to be tested alongside slower solutions<sup>3</sup>.

## F Parsel Pseudocode

We include a longer-form Parsel pseudocode in the style of Parsel. Note this pseudocode does not include backtranslation.

<sup>3</sup>As anticipating the number of steps that a solution will take universally is a version of the halting problem and thus intractable.

```

1  parsel(program, target_language, allow_autofill=False, allow_autodecomp=False): compile a program from a string specifying a
    ↳ Parsel program.
2  parse_program(program): parse the Parsel program string to a call graph
3  create_root_node(): create a root node as the current function node, without any constraints
4  parse_line(line, current_node, current_indent) -> function_graph: for each step up in indentation, set the current node
    ↳ to its parents. then, parse the definition, reference, or constraint.
5  parse_definition(line): create a new function node, make it a child of the current node's parent, then assign it as
    ↳ current node.
6  parse_line_to_fn(line) -> name, args, rets, description: extract the function name, arguments, optionally returned
    ↳ variables, and description of the form "name(args) -> rets: description" if return variables are present else "
    ↳ name(args): description".
7  populate_fn_node(name, args, rets, description): populate the new node's name, arguments, description, and optionally
    ↳ a list of returned variables.
8  parse_reference(line): add reference as a child of current node if reference is an ancestor or a direct child of an
    ↳ ancestor
9  parse_constraint(line): add the constraint to the current node's constraints.
10 get_dependency_graph(function_graph) -> dependency_graph: taking the function graph, create a copy where all nodes without
    ↳ constraints also depend on their parents unless the target language implicitly tests all functions.
11 identify_strongly_connected_components(dependency_graph): return SCCs of the dependency graph and the edges between the
    ↳ SCCs.
12 compile_scc(scc, scc_graph, allow_autofill, allow_autodecomp): accumulate a implementation string which solves the current
    ↳ function
13 compile_children(scc, scc_graph, allow_autofill, allow_autodecomp): compile any SCCs this SCC depends on and add them to
    ↳ the implementation string.
14 compile_scc
15 direct_product_implementations(fn_implementations): return the direct product of the list of lists of
    ↳ fn_implementations
16 generate_implementations(scc, n, children_implementation_str): for each function in the SCC, generate n implementations
    ↳ of each function starting with the implementation string of the SCC's children.
17 fn_implementation
18 fn_implementation(fn_node, n): prompt the language model to generate n implementations of a function
19 generate_prompt(fn_node): first prepend a string with all descriptions, names, arguments, and returns of fn_node's
    ↳ direct children, in a style idiomatic for the target language. then, add fn_node's description and function
    ↳ signature.
20 solve_constraints(scc, fn_implementations, n, allow_autofill, allow_autodecomp): taking the provided constraints of each
    ↳ function in the scc, evaluate a shuffled list of the direct product of implementations with the constraints until
    ↳ one passes all of them
21 generate_constraints(fn_node): translate each of the constraints into an evaluation string idiomatic to the target
    ↳ language
22 eval_str(scc, implementation_str, allow_autofill): evaluate an implementation including constraints by running it in a
    ↳ target-language executor. if allow_autofill and the execution fails due to an undefined reference, attempt
    ↳ autofill
23 exec_implementation(implementation_str): run the implementation, including constraints/tests, in a target-language-
    ↳ specific executor, returning whether it was successful
24 attempt_autofill(scc, implementation_str, undefined_fn_use_example): create a new function node for the referenced
    ↳ function, then re-attempt to execute autofill
25 add_undefined_fn(scc, implementation_str, undefined_fn_caller, undefined_fn_use_example): create a new function
    ↳ node for the undefined function as a child of the function which calls it and add it to the scc and
    ↳ implementation string. prompt the language model with the usage example as the description to generate a set
    ↳ of implementations.
26 fn_implementation
27 eval_str
28 on_fail(scc, scc_graph, allow_autofill, allow_autodecomp): if allowing autodecomposition, attempt to decompose.
    ↳ otherwise, raise an error highlighting the scc which could not be compiled
29 attempt_autodecomp(scc, scc_graph, allow_autofill, allow_autodecomp): prompt the language model to decompose each
    ↳ unimplemented function node.
30 prompt_model(fn_node): prompt the language model, asking it to generate a "fn_name(arg): desc" for each subfunction
    ↳ necessary to implement the function node. add those functions to the scc, including a set of possible
    ↳ implementations for each.
31 fn_implementation
32 compile_scc
33 raise_error(scc): raise an error that Parsel could compile the scc

```

Figure A.12: Longer pseudocode of Parsel, including automatic infilling and automatic decomposition.

729 **G Parsel Overview (Detailed)**

730 We include a more detailed figure outlining Parsel.

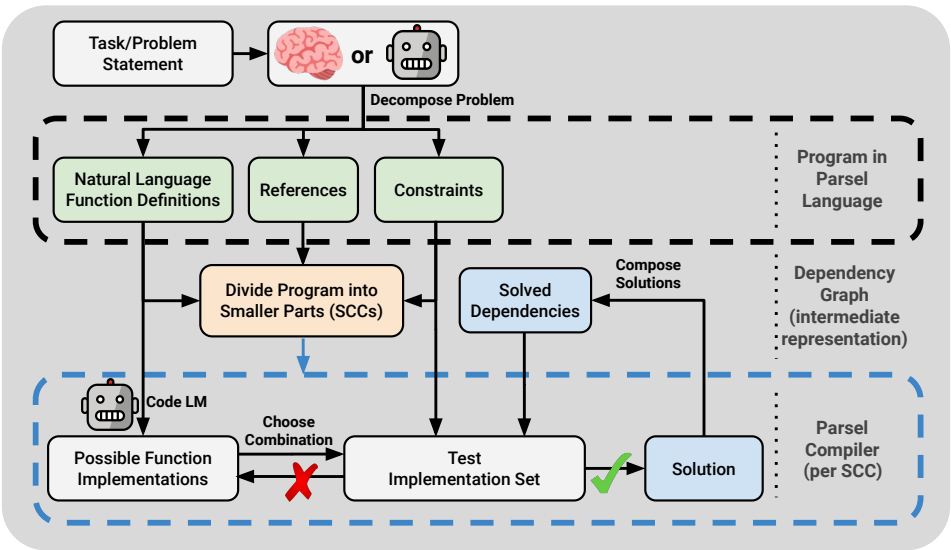

Figure A.13: Parsel overview (detailed).

731 **H Lisp Interpreter**

732 We include the Parsel code for a minimal Lisp interpreter.

```

1 An env is a dictionary of {'var':val} pairs, with a link to its outer environment in env['_outer'].
2 A procedure is a lambda expression, with parms, body, and env which calls eval_exp on the body.
3 #####
4 evaluate_program(program): Initialize a standard environment. Parse and evaluate a list of expressions, returning the final
    ↪ result.
5 ['(define square (lambda (r) (* r r)))', '(square 3)'] -> 9
6 get_env(parms, args, env=None): Return a new env inside env with parms mapped to their corresponding args, and env as the
    ↪ new env's outer env.
7 [], [] -> {'_outer': None}
8 ['a'], [1] -> {'a': 1, '_outer': None}
9 standard_env(includes=['math', 'ops', 'simple_math']): An environment with some Scheme standard procedures. Start with an
    ↪ environment and update it with standard functions.
10 [] -> {'_outer': None}
11 get_math(): Get a dictionary mapping math library function names to their functions.
12 get_ops(): Get a dictionary mapping operator symbols to their functions: +, -, *, /, >, <, >=, <=, =.
13 get_simple_math(): Get a dictionary mapping 'abs', 'min', 'max', 'not', 'round' to their functions.
14 apply_fn_dict_key(fn_dict_generator, key, args_list): Return the value of fn_dict_generator()[key](args_list) in
    ↪ standard_env.
15 get_math, 'sqrt', [4] -> 2.0
16 get_ops, '+', [1, 2] -> 3
17 get_simple_math, 'abs', [-1] -> 1
18 get_math
19 get_ops
20 get_simple_math
21 parse_and_update(expression, env): Parse an expression, return the result.
22 "(+ 1 (* 2 3))", {'+': (lambda x, y: x + y), '*': (lambda x, y: x * y), '_outer': None} -> 7
23 eval_exp(x, env): Evaluate an expression in an environment and return the result. Check if x is a list, a string, or
    ↪ neither, and call the corresponding function.
24 1, {'_outer': None} -> 1
25 find(env, var): Find the value of var in the innermost env where var appears.
26 {'a':4, '_outer':None}, 'a' -> 4
27 {'_outer':{'a':4, '_outer':None}}, 'a' -> 4
28 {'a':3, '_outer':{'a':4, '_outer':None}}, 'a' -> 3
29 string_case(x, env): Return find(env, x).
30 'a', {'a':4, '_outer':None} -> 4
31 find
32 list_case(x, env): Handle the function specified by the first value of x. Handle the first value of x being quote, if,
    ↪ define, set!, lambda, or otherwise. Return the result.
33 ['quote', 'a'], {'_outer': None} -> 'a'
34 ['if', True, 1, 2], {'_outer': None} -> 1
35 ['define', 'a', 1], {'_outer': None} -> None
36 get_procedure(parms, body, env): Return a procedure which evaluates body in a new environment with parms bound to the
    ↪ args passed to the procedure (in the same order as parms).
37 eval_procedure(parms, body, env, args): Gets a procedure and returns the result of evaluating proc(args) in env.
    ↪ Should not be called directly.
38 ['r'], ['*', 'pi'], ['*', 'r', 'r']], {'*': (lambda x, y: x * y), 'pi': 3, '_outer': None}, [1] -> 3
39 get_procedure
40 get_env
41 eval_exp
42 otherwise_case(x, env): Get the procedure by evaluating the first value of x. Then, evaluate the arguments and apply
    ↪ the procedure to them. Return the result.
43 ['+', 1, 2], {'+': (lambda x, y: x + y), '_outer': None} -> 3
44 eval_exp
45 eval_exp
46 not_list_case(x, env): Return x
47 1, {} -> 1
48 parse(program): Read a Scheme expression from a string.
49 '(1 + (2 * 3))' -> [1, '+', [2, '*', 3]]
50 tokenize(s): Convert a string into a list of tokens, including parens.
51 "1 + 2" -> ['1', '+', '2']
52 "1 + (2 * 3)" -> ['1', '+', '(', '2', '*', '3', ')']
53 read_from_tokens(tokens): Translate tokens to their corresponding atoms, using parentheses for nesting lists.
54 ['(', '1', '+', '(', '2', '*', '3', ')', ')'] -> [1, '+', [2, '*', 3]]
55 atom(token): Numbers become numbers; every other token is a string.
56 "1" -> 1
57 "a" -> "a"
58 "1.2" -> 1.2
59 nested_list_to_str(exp): Convert a nested list into a string with nesting represented by parentheses.
60 1 -> "1"
61 [1, '+', [2, '*', 3]] -> "(1 + (2 * 3))"

```

Figure A.14: Full Lisp interpreter implementation in Parsel, including constraints.

## 733 I Case Study

734 We include a simple example function we could not generate with Codex [12] directly from the top-  
 735 level description in Figure A.15. The corresponding Python code (included in the appendix) is exactly  
 736 58 non-whitespace lines of code, including 17 lines of comments (3 corresponding to the descriptions),  
 737 2 asserts, and 39 lines implementing the three functions described as well as an automatically  
 738 generated `get_number_of_active_cells_around_cell` function. In fact, using automatic decomposition,  
 739 as discussed in Subsection Q.3, it is not necessary to provide any of the function descriptions besides  
 740 the top one. The model is (unsurprisingly) able to understand that `game_of_life_inversion_iteration`  
 741 can be broken down into `invert_array` and `game_of_life_iteration`.

```
1 game_of_life_inversion_iteration(array_at_time_t): Takes a board and returns the next
  ↳ iteration of the game of life, but with all values flipped
2 [[0,0,1],[1,0,0],[1,0,0]] -> [[1,1,1],[1,0,1],[1,1,1]]
3 [[0,1,0,0],[1,0,1,0],[1,0,0,1],[0,1,1,0]] -> [[1,0,1,1],[0,1,0,1],[0,1,1,0],[1,0,0,1]]
4 game_of_life_iteration(array_at_time_t) -> array_at_time_t_plus_1: Takes a board with
  ↳ active and inactive cells as a list of lists and returns the next iteration of the
  ↳ game of life
5 array_inversion(array) -> inverted_array: Invert a square array by flipping 0's and 1's
```

Figure A.15: An example Parsel program for Python that takes in a list of lists representing a state of Conway's game of life [24] and returns the next state, with all the values inverted.

## 742 J Parsel Prompts

```
1 # Description: given a list of lists representing the cost of each edge, return an adjacency
  ↳ matrix corresponding to the minimum spanning tree.
2 def minimum_spanning_tree(cost_matrix):
```

Figure A.16: Codex Prompt for an example leaf node

```
1 # Description: given a list of lists representing the cost of building a road between any two
  ↳ cities, and a list representing the cost of building an airport in a city, return a new
  ↳ cost matrix with a new node corresponding to the sky.
2 # Signature: sky_city_cost(city_road_cost, city_airport_cost)
3 from helpers import sky_city_cost
4
5 # Description: given a list of lists representing the cost of each edge, return an adjacency
  ↳ matrix corresponding to the minimum spanning tree.
6 # Signature: minimum_spanning_tree(cost_matrix)
7 from helpers import minimum_spanning_tree
8
9 # Description: given a list of lists representing an adjacency matrix, return a list of the
  ↳ nodes connected to the final node. However, if only one node is connected to the final
  ↳ node, return an empty list.
10 # Signature: final_node_connectors(adjacency_matrix)
11 from helpers import final_node_connectors
12
13 # Description: given a matrix representing the cost of building a road between any two cities,
  ↳ and a list representing the cost of building an airport in a city (where any two cities
  ↳ with airports are connected), return a list of the cities that should have airports
  ↳ built in them to minimize the total cost of building roads and airports such that all
  ↳ cities are connected. The list should be sorted in ascending order.
14 # Uses: sky_city_cost, minimum_spanning_tree, final_node_connectors
15 def select_airport_cities(city_road_cost, city_airport_cost):
```

Figure A.17: Codex Prompt for an example merge node

```
1 # Reviewer:
2 # Please explain the above function in one sentence with as much detail as possible.
3 # In your one-sentence description, specify the range and domain of your function precisely.
4 # Your description should be clear enough that someone could reimplement the function from it.
   ⇐→
5 # Author:
6 # Sounds good, here's my one-sentence explanation of {name}:
7 # {name}
```

Figure A.18: Prompt format to generate descriptions for backtranslation

## 743 K APPS Backtranslation

### 744 K.1 Backtranslation / decompiling.

745 We anticipate that there are many programs that LLMs can implement by first generating Parsel code.  
746 But, as Parsel is a new framework, while language models can sometimes generate Parsel programs  
747 with few-shot prompts, it is not a syntax they have previously encountered. Thus, we may want to use  
748 existing code in other languages to construct datasets of Parsel programs from other languages. This  
749 requires us to first extract the call graph from the code, generate descriptions for each of the functions,  
750 and then generate Parsel programs from the graph. This call graph representation is convenient, so it  
751 is useful to have a bidirectional method to produce a graph from Parsel code and to produce Parsel  
752 code from the graph.

753 We filter the dataset to problems with starter code (providing the name of the evaluated function) and  
754 unit tests (provided as input-output pairs). For those tasks, we select solutions that define and call at  
755 least three functions, with at least one over 4 lines long and none over 15 lines.

756 As a proof of concept, we show 10 Parsel solutions which we could automatically generate from the  
757 APPS solutions. We generated the descriptions by prompting Codex to explain each function and  
758 its inputs and outputs. From this, we use backtranslation to attempt to implement these solutions in  
759 Python. We then verify that they are correct by applying the original unit tests as constraints on the  
760 root function. As mentioned in Section 1, the Parsel code is substantially shorter in terms of lines of  
761 code. We include these in Appendix K.

### 762 K.2 Examples

763 We exclude the asserts in these examples for brevity - they correspond to those in the original dataset.

```
1 longest_palindrome(s): longest_palindrome takes a string s and returns the longest palindrome
  ↪ in s.
2 is_palindrome(s): is_palindrome returns True if the string s is the same forwards and
  ↪ backwards, and False otherwise.
3 check(li, ri, s): check takes a string s, a left index li, and a right index ri, and
  ↪ returns the longest palindrome that starts at or before li and ends at or after ri.
4 is_palindrome
```

Figure A.19: Train Problem 1638, Solution 2

```

1 # longest_palindrome takes a string s and returns the longest palindrome in s.
2 def longest_palindrome(s):
3     if len(s) <= 1:
4         return s
5     else:
6         longest = s[0]
7         for i in range(len(s)):
8             for j in range(len(s)):
9                 if is_palindrome(check(i, j, s)) and len(check(i, j, s)) > len(longest):
10                     longest = check(i, j, s)
11     return longest
12
13 # is_palindrome returns True if the string s is the same forwards and backwards, and False
14   ⇨ otherwise.
15 def is_palindrome(s):
16     if len(s) <= 1:
17         return True
18     else:
19         return s[0] == s[-1] and is_palindrome(s[1:-1])
20
21 # check takes a string s, a left index li, and a right index ri, and returns the longest
22   ⇨ palindrome that starts at or before li and ends at or after ri.
23 def check(li, ri, s):
24     while li >= 0 and ri < len(s) and s[li] == s[ri]:
25         li -= 1
26         ri += 1
27     return s[li+1:ri]

```

Figure A.20: Train Problem 1638, Solution 2

```

1 case_id(c_str): case_id takes a string and returns a string that is either "kebab", "snake",
2   ⇨ "camel", or "none" depending on whether the input string is in kebab case, snake case,
3   ⇨ camel case, or none of the above.
4 is_snake(s): is_snake takes a string and returns True if the string is snake_case and False
5   ⇨ otherwise.
6 is_kebab(s): is_kebab takes a string and returns True if the string is a kebab-case string,
7   ⇨ and False otherwise.
8 is_camel(s): is_camel returns True if the string s is not lowercase, does not contain
9   ⇨ dashes, and does not contain underscores.

```

Figure A.21: Train Problem 2892, Solution 7

```

1 # case_id takes a string and returns a string that is either "kebab", "snake", "camel", or "
  ↳ none" depending on whether the input string is in kebab case, snake case, camel case, or
  ↳ none of the above.
2 def case_id(c_str):
3     if is_snake(c_str) == True:
4         return "snake"
5     elif is_kebab(c_str) == True:
6         return "kebab"
7     elif is_camel(c_str) == True:
8         return "camel"
9     else:
10        return "none"
11
12 # is_snake takes a string and returns True if the string is snake_case and False otherwise.
13 def is_snake(s):
14     if s[0].isalpha() and s[0].islower() and len(s) > 1:
15         for char in s:
16             if char.isalpha():
17                 if char.isupper():
18                     return False
19                 elif char == '_':
20                     pass
21             else:
22                 return False
23         return True
24     else:
25         return False
26
27 # is_kebab takes a string and returns True if the string is a kebab-case string, and False
  ↳ otherwise.
28 def is_kebab(s):
29     # if s is empty, False
30     if s == '':
31         return False
32     # if s is not a string, False
33     if type(s) != str:
34         return False
35     # if s is not lowercase, False
36     if s != s.lower():
37         return False
38     # if s contains anything other than a-z or -, False
39     for c in s:
40         if not (c.isalpha() or c == '-'):
41             return False
42     # if s contains a - at the beginning or end, False
43     if s[0] == '-' or s[-1] == '-':
44         return False
45     # if s contains more than one - in a row, False
46     for i in range(len(s)-1):
47         if s[i] == '-' and s[i+1] == '-':
48             return False
49     # otherwise, True
50     return True
51
52
53 # is_camel returns True if the string s is not lowercase, does not contain dashes, and does
  ↳ not contain underscores.
54 def is_camel(s):
55     return s != s.lower() and s.find('_') == -1 and s.find('-') == -1

```

Figure A.22: Train Problem 2892, Solution 7

```

1 find_2nd_largest(arr): find_2nd_largest takes a list of numbers and returns the second
  ↪ largest number in the list.
2 filter_int(arr): filter_int takes an array of integers and returns an array of integers.
3 sec_big(a, b): sec_big takes two numbers and returns the smaller of the two.
4 sort(arr): sort takes an array of numbers and returns a sorted array of numbers.
5 is_diff(arr): is_diff takes an array of numbers and returns True if there are any two
  ↪ numbers in the array that are different, and False if all the numbers in the array are
  ↪ the same.

```

Figure A.23: Train Problem 3090, Solution 9

```

1 # find_2nd_largest takes a list of numbers and returns the second largest number in the list.
2 def find_2nd_largest(arr):
3     if len(arr) == 1:
4         return None
5     arr = filter_int(arr)
6     if len(arr) == 0:
7         return None
8     if len(arr) == 1:
9         return arr[0]
10    arr = sort(arr)
11    if is_diff(arr) == False:
12        return None
13    res = arr[len(arr) - 2]
14    return res
15
16 # filter_int takes an array of integers and returns an array of integers.
17 def filter_int(arr):
18     return list(filter(lambda x: type(x) == int, arr))
19
20 # sec_big takes two numbers and returns the smaller of the two.
21 def sec_big(a, b):
22     if a > b:
23         return b
24     else:
25         return a
26
27 # sort takes an array of numbers and returns a sorted array of numbers.
28 def sort(arr):
29     return sorted(arr)
30
31 # is_diff takes an array of numbers and returns True if there are any two numbers in the
  ↪ array that are different, and False if all the numbers in the array are the same.
32 def is_diff(arr):
33     for i in range(len(arr) - 1):
34         if arr[i] != arr[i + 1]:
35             return True
36     return False

```

Figure A.24: Train Problem 3090, Solution 9

```

1 happy_numbers(n): happy_numbers takes a positive integer n and returns a list of all the
  ↪ happy numbers between 1 and n, inclusive.
2 _is_happy_number(number): _is_happy_number takes a positive integer and returns True if the
  ↪ number is a happy number, False otherwise.
3 _sum_squares(number): _sum_squares takes a non-negative integer and returns the sum of
  ↪ the squares of its digits.

```

Figure A.25: Train Problem 3140, Solution 7

```

1 # happy_numbers takes a positive integer n and returns a list of all the happy numbers
  ↳ between 1 and n, inclusive.
2 def happy_numbers(n):
3     return [i for i in range(1, n + 1) if _is_happy_number(i)]
4
5 # _is_happy_number takes a positive integer and returns True if the number is a happy number,
  ↳ False otherwise.
6 def _is_happy_number(number):
7     # We want to make sure that the number is positive
8     if number < 0:
9         return False
10    # We want to make sure that the number is not 1
11    if number == 1:
12        return True
13    # We want to keep track of the numbers we have used
14    used_numbers = []
15    # We want to loop through the number
16    while number not in used_numbers:
17        # We want to add the number to the list of used numbers
18        used_numbers.append(number)
19        # We want to find the sum of the squares of the digits of the number
20        number = _sum_squares(number)
21        # We want to check if the number is one
22        if number == 1:
23            # We want to return True
24            return True
25        # We want to return False
26        return False
27
28 # _sum_squares takes a non-negative integer and returns the sum of the squares of its digits.
29 def _sum_squares(number):
30     if number < 0:
31         raise ValueError
32     else:
33         number = str(number)
34         sum = 0
35         for i in number:
36             sum += int(i) ** 2
37     return sum

```

Figure A.26: Train Problem 3140, Solution 7

```

1 am_i_wilson(n): am_i_wilson(n) returns True if n is a prime number between 2 and 563,
  ↳ inclusive, and False otherwise.
2 is_prime(n): is_prime takes a positive integer n and returns True if n is prime and False
  ↳ otherwise.
3 factorial(n): factorial(n) returns the product of all integers from 1 to n, inclusive.

```

Figure A.27: Train Problem 3229, Solution 26

```

1 # am_i_wilson(n) returns True if n is a prime number between 2 and 563, inclusive, and False
  ↪ otherwise.
2 def am_i_wilson(n):
3     if is_prime(n) and 2 <= n and n <= 563:
4         return (factorial(n-1) + 1) % (n**2) == 0
5     else:
6         return False
7
8 # is_prime takes a positive integer n and returns True if n is prime and False otherwise.
9 def is_prime(n):
10     if n == 2:
11         return True
12     if n == 3:
13         return True
14     if n % 2 == 0:
15         return False
16     if n % 3 == 0:
17         return False
18     i = 5
19     w = 2
20     while i * i <= n:
21         if n % i == 0:
22             return False
23         i += w
24         w = 6 - w
25     return True
26
27
28 # factorial(n) returns the product of all integers from 1 to n, inclusive.
29 def factorial(n):
30     if n == 0:
31         return 1
32     else:
33         return n * factorial(n-1)

```

Figure A.28: Train Problem 3229, Solution 26

```

1 am_i_wilson(n): am_i_wilson takes a positive integer n and returns True if n is prime and (n
  ↪ -1)! + 1 is divisible by n^2, and False otherwise.
2 fac(n): fac is a function that takes a positive integer n and returns the product of all
  ↪ integers from 1 to n.
3 is_prime(n): is_prime takes a positive integer n and returns True if n is prime and False
  ↪ otherwise.

```

Figure A.29: Train Problem 3229, Solution 71

```

1 # am_i_wilson takes a positive integer n and returns True if n is prime and (n-1)! + 1 is
  ↳ divisible by n^2, and False otherwise.
2 def am_i_wilson(n):
3     return is_prime(n) and (fac(n-1) + 1) % n**2 == 0
4
5 # fac is a function that takes a positive integer n and returns the product of all integers
  ↳ from 1 to n.
6 def fac(n):
7     if n == 0:
8         return 1
9     return n * fac(n-1)
10 # is_prime takes a positive integer n and returns True if n is prime and False otherwise.
11 def is_prime(n):
12     if n == 2:
13         return True
14     elif n < 2 or n % 2 == 0:
15         return False
16     for i in range(3, int(n**0.5)+1, 2):
17         if n % i == 0:
18             return False
19     return True

```

Figure A.30: Train Problem 3229, Solution 71

```

1 evil(n): evil(n) returns "It's Evil!" if n is an evil number, otherwise it returns "It's
  ↳ Odious!" The range of evil is the set of all integers, and the domain is the set of all
  ↳ strings.
2 evilometer(n): evilometer(n) is a generator that yields n times if n is even, and yields n
  ↳ // 2 times if n is odd.

```

Figure A.31: Train Problem 3321, Solution 33

```

1 # evil(n) returns "It's Evil!" if n is an evil number, otherwise it returns "It's Odious!"
  ↳ The range of evil is the set of all integers, and the domain is the set of all strings.
2 def evil(n):
3     gen = evilometer(n)
4     if sum(list(gen)) % 2 == 0:
5         return "It's_Evil!"
6     else:
7         return "It's_Odious!"
8
9 # evilometer(n) is a generator that yields n times if n is even, and yields n // 2 times if n
  ↳ is odd.
10 def evilometer(n):
11     while n:
12         yield n
13         if n % 2:
14             n //= 2
15         else:
16             n -= 1

```

Figure A.32: Train Problem 3321, Solution 33

```

1 circular_prime(number): circular_prime takes a number and returns True if it is a circular
  ↳ prime, and False otherwise.
2 rotate(l, n): rotate takes a list and an integer and returns a new list with the last n
  ↳ elements of the original list moved to the front.
3 is_prime(n): is_prime returns True if n is a prime number, and False otherwise.

```

Figure A.33: Train Problem 3368, Solution 5

```

1 # circular_prime takes a number and returns True if it is a circular prime, and False
  ⇨ otherwise.
2 def circular_prime(number):
3     if is_prime(number) == False:
4         return False
5     else:
6         for i in range(len(str(number))-1):
7             number = rotate(str(number), 1)
8             if is_prime(int(number)) == False:
9                 return False
10        return True
11
12 # rotate takes a list and an integer and returns a new list with the last n elements of the
  ⇨ original list moved to the front.
13 def rotate(l, n):
14     return l[-n:] + l[:-n]
15
16 # is_prime returns True if n is a prime number, and False otherwise.
17 def is_prime(n):
18     if n < 2:
19         return False
20     for i in range(2, int(n ** 0.5) + 1):
21         if n % i == 0:
22             return False
23     return True

```

Figure A.34: Train Problem 3368, Solution 5

```

1 circular_prime(n): circular_prime(n) returns True if n is a circular prime, and False
  ⇨ otherwise.
2 is_prime(n): is_prime takes a number n and returns True if n is prime and False if n is not
  ⇨ prime.
3 circul_num(n, l): circul_num takes an integer n and an integer l, and returns the integer
  ⇨ that results from moving the first digit of n to the end of n, and then padding the
  ⇨ result with zeros until it has length l.

```

Figure A.35: Train Problem 3368, Solution 6

```

1 # circular_prime(n) returns True if n is a circular prime, and False otherwise.
2 def circular_prime(n):
3     # Check if n is a prime number.
4     if not is_prime(n):
5         return False
6     else:
7         # Get the length of n.
8         length = len(str(n))
9         # Get the first digit of n.
10        first_digit = str(n)[0]
11        # Get the number of rotations.
12        rotations = length
13        # Rotate n.
14        while rotations > 0:
15            # Get the new number.
16            n = circul_num(n, length)
17            # Check if n is a prime number.
18            if not is_prime(n):
19                return False
20            # Decrement the number of rotations.
21            rotations -= 1
22        return True
23 # is_prime takes a number n and returns True if n is prime and False if n is not prime.
24 def is_prime(n):
25     if n == 2 or n == 3:
26         return True
27     if n % 2 == 0 or n < 2:
28         return False
29     for i in range(3, int(n**0.5)+1, 2): # only odd numbers
30         if n % i == 0:
31             return False
32     return True
33
34 # circul_num takes an integer n and an integer l, and returns the integer that results from
35   ↳ moving the first digit of n to the end of n, and then padding the result with zeros
36   ↳ until it has length l.
37 def circul_num(n, l):
38     n = str(n)
39     digit = n[0]
40     n = n[1:] + digit
41     n = n.ljust(l, "0")
42     return int(n)

```

Figure A.36: Train Problem 3368, Solution 6

```

1 list_squared(m, n): list_squared(m, n) returns a list of lists of integers, where each
2   ↳ sublist contains an integer and its sum of squared divisors, and the integers are in the
3   ↳ range [m, n] (inclusive).
4 divisors_list(num): divisors_list takes a number and returns a list of all the divisors of
5   ↳ that number.
6 sum_squares(nums): sum_squares takes a list of numbers and returns the sum of the squares
7   ↳ of those numbers.
8 isSquarable(num): isSquarable takes a number and returns True if the number is a perfect
9   ↳ square, and False otherwise.

```

Figure A.37: Train Problem 3393, Solution 35

```

1 # list_squared(m, n) returns a list of lists of integers, where each sublist contains an
  ↳ integer and its sum of squared divisors, and the integers are in the range [m, n] (
  ↳ inclusive).
2 def list_squared(m, n):
3     result = []
4     for num in range(m, n + 1):
5         divisors = divisors_list(num)
6         sum_of_squares = sum_squares(divisors)
7         if isSquarable(sum_of_squares):
8             result.append([num, sum_of_squares])
9     return result
10 # divisors_list takes a number and returns a list of all the divisors of that number.
11 def divisors_list(num):
12     divisors = []
13     for i in range(1, num + 1):
14         if num % i == 0:
15             divisors.append(i)
16     return divisors
17
18
19 # sum_squares takes a list of numbers and returns the sum of the squares of those numbers.
20 def sum_squares(nums):
21     sum = 0
22     for i in range(len(nums)):
23         sum += nums[i]**2
24     return sum
25
26 # isSquarable takes a number and returns True if the number is a perfect square, and False
  ↳ otherwise.
27 def isSquarable(num):
28     root = num ** (1/2)
29     if root % 1 == 0:
30         return True
31     else:
32         return False

```

Figure A.38: Train Problem 3393, Solution 35



```

1 # Takes a board and returns the next iteration of the game of life, but with all values
  ↪ flipped
2 def game_of_life_inversion_iteration(array_at_time_t):
3     # Your code here
4     #return game_of_life_iteration(invert_array(array_at_time_t))
5     return invert_array(game_of_life_iteration(array_at_time_t))
6
7 # Takes a board and returns the next iteration of the game of life
8 def invert_array(array_at_time_t):
9     return [list(map(lambda x: 1-x, row)) for row in array_at_time_t]
10
11 # Takes a board and returns the board with all values flipped
12 def game_of_life_iteration(array_at_time_t):
13     # The array that will be returned
14     array_at_time_t_plus_1 = []
15
16     # Iterate through the rows of the array
17     for i in range(0, len(array_at_time_t)):
18         # The array that will contain the next row
19         next_row = []
20
21         # Iterate through the columns of the array
22         for j in range(0, len(array_at_time_t[i])):
23             # The number of neighbors
24             num_neighbors = 0
25
26             # Iterate through the neighbors of the cell
27             for k in range(-1, 2):
28                 for l in range(-1, 2):
29                     # Don't count the cell itself
30                     if k == 0 and l == 0:
31                         continue
32
33                     # Check if the neighbor is valid
34                     if i + k >= 0 and i + k < len(array_at_time_t) and j + l >= 0 and j + l <
  ↪ len(array_at_time_t[i]):
35                         # If the neighbor is alive, increment the number of neighbors
36                         if array_at_time_t[i + k][j + l] == 1:
37                             num_neighbors += 1
38
39             # If the cell is alive, check if it should die
40             if array_at_time_t[i][j] == 1:
41                 if num_neighbors < 2 or num_neighbors > 3:
42                     next_row.append(0)
43             else:
44                 next_row.append(1)
45             # If the cell is dead, check if it should become alive
46             else:
47                 if num_neighbors == 3:
48                     next_row.append(1)
49                 else:
50                     next_row.append(0)
51
52             # Add the next row to the array
53             array_at_time_t_plus_1.append(next_row)
54
55     # Return the next array
56     return array_at_time_t_plus_1
57
58 assert game_of_life_inversion_iteration([[0, 0, 1], [1, 0, 0], [1, 0, 0]]) == [[1, 1, 1], [1,
  ↪ 0, 1], [1, 1, 1]]
59 assert game_of_life_inversion_iteration([[0, 1, 0, 0], [1, 0, 1, 0], [1, 0, 0, 1], [0, 1, 1,
  ↪ 0]]) == [[1, 0, 1, 1], [0, 1, 0, 1], [0, 1, 1, 0], [1, 0, 0, 1]]

```

Figure A.39: Compilation of the program taking Conway's game of life [24] and returning the next state, with the values inverted. In this case, we use automatic decomposition to generate the two subfunctions of `game_of_life_iteration`. 35

```

1 # Takes a board with active and inactive cells and returns the next iteration of the game of
  ↳ life, but with all the values flipped
2 def game_of_life_inversion_iteration(array_at_time_t):
3     return array_inversion(game_of_life_iteration(array_at_time_t))
4
5 # Takes a board with active and inactive cells as a list of lists and returns the next
  ↳ iteration of the game of life
6 def game_of_life_iteration(array_at_time_t):
7     array_at_time_t_plus_1 = []
8     for row in range(len(array_at_time_t)):
9         array_at_time_t_plus_1.append([])
10        for column in range(len(array_at_time_t[row])):
11            array_at_time_t_plus_1[row].append(0)
12    for row in range(len(array_at_time_t)):
13        for column in range(len(array_at_time_t[row])):
14            if array_at_time_t[row][column] == 1:
15                if count_neighbors(array_at_time_t, row, column) < 2:
16                    array_at_time_t_plus_1[row][column] = 0
17                elif count_neighbors(array_at_time_t, row, column) > 3:
18                    array_at_time_t_plus_1[row][column] = 0
19                else:
20                    array_at_time_t_plus_1[row][column] = 1
21            else:
22                if count_neighbors(array_at_time_t, row, column) == 3:
23                    array_at_time_t_plus_1[row][column] = 1
24    return array_at_time_t_plus_1
25
26 # Invert a square array by replacing all 0's with 1's and vice versa
27 def array_inversion(array):
28     inverted_array = []
29     for i in range(len(array)):
30         inverted_array.append([])
31         for j in range(len(array[i])):
32             inverted_array[i].append(1 - array[i][j])
33     return inverted_array
34
35 #
36 def count_neighbors(array_at_time_t, row, column):
37     count = 0
38     for i in range(row-1, row+2):
39         for j in range(column-1, column+2):
40             if i == row and j == column:
41                 continue
42             if i < 0 or j < 0:
43                 continue
44             if i >= len(array_at_time_t) or j >= len(array_at_time_t[0]):
45                 continue
46             if array_at_time_t[i][j] == 1:
47                 count += 1
48     return count
49
50
51 assert game_of_life_inversion_iteration([[0, 0, 1], [1, 0, 0], [1, 0, 0]]) == [[1, 1, 1], [1,
  ↳ 0, 1], [1, 1, 1]]
52 assert game_of_life_inversion_iteration([[0, 1, 0, 0], [1, 0, 1, 0], [1, 0, 0, 1], [0, 1, 1,
  ↳ 0]]) == [[1, 0, 1, 1], [0, 1, 0, 1], [0, 1, 1, 0], [1, 0, 0, 1]]
53
54 assert game_of_life_iteration([[0, 0, 1], [1, 0, 0], [1, 0, 0]]) == [[0, 0, 0], [0, 1, 0], [0,
  ↳ 0, 0]]
55 assert game_of_life_iteration([[0, 1, 0, 0], [1, 0, 1, 0], [1, 0, 0, 1], [0, 1, 1, 0]]) ==
  ↳ [[0, 1, 0, 0], [1, 0, 1, 0], [1, 0, 0, 1], [0, 1, 1, 0]]
56
57 assert array_inversion([[1]]) == [[0]]
58 assert array_inversion([[0, 1], [1, 0]]) == [[1, 0], [0, 1]]

```

Figure A.40: Compilation of the program taking Conway's game of life [24] and returning the next state, with the values inverted. In this case, we use automatic infilling to generate the `count_neighbors` function.

```

1 # Calls base_case if 1, otherwise recursion_rule
2 def collatz_recursion(num, cur_list=list()):
3     if num == 1:
4         return base_case(num, cur_list)
5     else:
6         return recursion_rule(num, cur_list)
7
8 # Returns the list with the number appended to it
9 def base_case(num, cur_list):
10     cur_list.append(num)
11     return cur_list
12
13
14 # Add num to list, collatz with  $3n + 1$  if odd or  $n / 2$  if even
15 def recursion_rule(num, cur_list):
16     cur_list.append(num)
17     if num % 2 == 0:
18         return collatz_recursion(num / 2, cur_list)
19     else:
20         return collatz_recursion((3 * num) + 1, cur_list)
21
22
23 assert collatz_recursion(19) == [19, 58, 29, 88, 44, 22, 11, 34, 17, 52, 26, 13, 40, 20, 10,
    ↪ 5, 16, 8, 4, 2, 1]

```

Figure A.41: Compilation of the program generating a list corresponding to the Collatz conjecture.

```

1 -- if p ∧ q, then q ∧ p
2 lemma p_q_implies_q_p(p q: Prop):
3
4   p ∧ q → q ∧ p :=
5 begin
6   intro h,
7   cases h with hp hq,
8   split,
9     exact hq,
10    exact hp,
11 end
12
13 -- Description: if p ∨ q, then q ∨ p
14 -- if q ∧ p, then p ∧ q
15 lemma q_p_implies_p_q(p q: Prop):
16
17   (q ∧ p) → (p ∧ q) :=
18 begin
19   intro h,
20   split,
21     exact h.right,
22     exact h.left,
23 end
24
25 /-
26   Theorem:
27     If q ∧ p, then p ∧ q
28 -/
29 -- the and operator is commutative
30 lemma and_commute(p q: Prop):
31   (p ∧ q → q ∧ p) ∧ (q ∧ p → p ∧ q) :=
32
33 begin
34   apply and.intro,
35   { apply p_q_implies_q_p },
36   { apply q_p_implies_p_q }
37 end
38
39 -- Description: if p ∧ q, then p
40 -- Signature: p_and_q_implies_p(p q: Prop)
41
42 -- show (p ∧ q → q ∧ p) ∧ (q ∧ p → p ∧ q)

```

Figure A.42: Generated proof of `and_commute`. We trim the post-proof comments elsewhere.

```

1 # given a list of lists representing the cost of building a road between any two cities, and a list representing the cost of
  ↳ building an airport in a city, return a new cost matrix with a new node corresponding to the sky.
2 def sky_city_cost(city_road_cost, city_airport_cost):
3     """
4     :param city_road_cost: list of lists representing cost of road between any two cities
5     :param city_airport_cost: list representing cost of an airport in a city
6     :return: new cost matrix with a new node corresponding to the sky
7     """
8     # add new node for sky to cost matrix
9     num_cities = len(city_road_cost)
10    sky_city_cost = [[0 for _ in range(num_cities + 1)] for _ in range(num_cities + 1)]
11    for i in range(num_cities):
12        for j in range(num_cities):
13            sky_city_cost[i][j] = city_road_cost[i][j]
14    for i in range(num_cities):
15        sky_city_cost[i][-1] = city_airport_cost[i]
16        sky_city_cost[-1][i] = city_airport_cost[i]
17    return sky_city_cost
18
19 # given a list of lists representing the cost of each edge, return an adjacency matrix corresponding to the minimum spanning
  ↳ true.
20 def minimum_spanning_tree(cost_matrix):
21     # This is a list of the vertices that have been added to the MST
22     visited = [0]
23     # This is a list of the vertices that have not been added to the MST
24     unvisited = [i for i in range(1, len(cost_matrix))]
25     # This is a list of edges that are part of the MST
26     edges = []
27     # This is the adjacency matrix corresponding to the MST
28     adjacency_matrix = [[0 for i in range(len(cost_matrix))] for j in range(len(cost_matrix))]
29     while len(unvisited) > 0:
30         # Get the index of the minimum edge
31         min_edge_index = -1
32         min_edge_value = float('inf')
33         for i in range(len(visited)):
34             for j in range(len(unvisited)):
35                 if cost_matrix[visited[i]][unvisited[j]] < min_edge_value:
36                     min_edge_index = (visited[i], unvisited[j])
37                     min_edge_value = cost_matrix[visited[i]][unvisited[j]]
38         # Add the minimum edge to our MST
39         edges.append(min_edge_index)
40         # Add the unvisited vertex to the list of visited vertices
41         visited.append(min_edge_index[1])
42         # Remove the unvisited vertex from the list of unvisited vertices
43         unvisited.remove(min_edge_index[1])
44         # Add edges to the adjacency matrix
45         for edge in edges:
46             adjacency_matrix[edge[0]][edge[1]] = 1
47             adjacency_matrix[edge[1]][edge[0]] = 1
48     return adjacency_matrix
49
50 # given a list of lists representing an adjacency matrix, return a list of the nodes connected to the final node. However,
  ↳ if only one node is connected to the final node, return an empty list.
51 def final_node_connectors(adjacency_matrix):
52     final_node = len(adjacency_matrix) - 1
53     final_node_connectors = []
54     for i in range(len(adjacency_matrix) - 1):
55         if adjacency_matrix[i][final_node] == 1:
56             final_node_connectors.append(i)
57     if len(final_node_connectors) == 1:
58         return []
59     return final_node_connectors
60
61 # given a matrix representing the cost of building a road between any two cities, and a list representing the cost of
  ↳ building an airport in a city (where any two cities with airports are connected), return a list of the cities that
  ↳ should have airports built in them to minimize the total cost of building roads and airports such that all cities are
  ↳ connected. The list should be sorted in ascending order.
62 def select_airport_cities(city_road_cost, city_airport_cost):
63     cost_matrix = sky_city_cost(city_road_cost, city_airport_cost)
64     adjacency_matrix = minimum_spanning_tree(cost_matrix)
65     return final_node_connectors(adjacency_matrix)
66
67 assert repr(str(select_airport_cities([[0, 3, 3], [3, 0, 3], [3, 3, 0]], [0, 0, 0]))) == repr(str([0, 1, 2]))
68 assert repr(str(select_airport_cities([[0, 3, 3], [3, 0, 3], [3, 3, 0]], [10, 10, 10]))) == repr(str([]))
69 assert repr(str(select_airport_cities([[0, 10, 3], [10, 0, 11], [3, 11, 0]], [1, 4, 5]))) == repr(str([0, 1]))
70
71 assert repr(str(sky_city_cost([[1, 2, 3], [1, 2, 3], [1, 2, 3]], [4, 5, 6]))) == repr(str([[1, 2, 3, 4], [1, 2, 3, 5], [1, 2,
  ↳ 3, 6], [4, 5, 6, 0]]))
72
73 assert repr(str(minimum_spanning_tree([[0, 1, 3, 4], [1, 0, 2, 100], [3, 2, 0, 5], [4, 100, 5, 0]]))) == repr(str([[0, 1, 0,
  ↳ 1], [1, 0, 1, 0], [0, 1, 0, 0], [1, 0, 0, 0]]))
74
75 assert repr(str(final_node_connectors([[0, 1, 0, 1], [1, 0, 1, 0], [0, 1, 0, 0], [1, 0, 0, 0]]))) == repr(str([]))
76 assert repr(str(final_node_connectors([[0, 1, 0, 1], [1, 0, 1, 0], [0, 1, 0, 1], [1, 0, 1, 0]]))) == repr(str([0, 2]))

```

Figure A.43: Generated solution for select\_airport\_cities.

```

1 # chess_game takes a board and returns the winner of the game.
2 def chess_game(board):
3     if weight(board) == 0:
4         return 'Draw'
5     if weight(board) > 0:
6         return 'White'
7     if weight(board) < 0:
8         return 'Black'
9
10 # weight takes a board and returns the weight of the board.
11 def weight(board):
12     weight = 0
13     for row in range(len(board)):
14         for col in range(len(board[row])):
15             if board[row][col] != '.':
16                 weight += weight_helper(board, row, col, 0)
17     return weight
18
19 # weight_helper takes a board, a row, a column, and a weight and returns the weight of the
    ↪ board.
20 def weight_helper(board, row, col, weight):
21     if board[row][col] == '.':
22         return 0
23     elif board[row][col] == 'Q':
24         return weight + 9
25     elif board[row][col] == 'R':
26         return weight + 5
27     elif board[row][col] == 'B':
28         return weight + 3
29     elif board[row][col] == 'N':
30         return weight + 3
31     elif board[row][col] == 'P':
32         return weight + 1
33     elif board[row][col] == 'q':
34         return weight - 9
35     elif board[row][col] == 'r':
36         return weight - 5
37     elif board[row][col] == 'b':
38         return weight - 3
39     elif board[row][col] == 'n':
40         return weight - 3
41     elif board[row][col] == 'p':
42         return weight - 1
43     else:
44         return weight
45
46 assert repr(str(chess_game('...QK...\n.....\n.....\n.....\n.....\n.....\n
    ↪ ..... \n...rk...'))) == repr('White')
47 assert repr(str(chess_game('rnbqkbnr\npppppppp\n.....\n.....\n.....\n.....\n
    ↪ nPPPPPPPP\nRNBQKBNR')))) == repr('Draw')
48 assert repr(str(chess_game('rppppppr\n...k...\n.....\n.....\n.....\n.....\nK...Q
    ↪ ... \n.....'))) == repr('Black')
49 assert repr(str(chess_game('...bQ.K\n.B.....\n.....P..\n.....\n.....\n.....\nN.
    ↪ P..\n.....R..'))) == repr('White')
50 ...

```

Figure A.44: Generated solution for Problem 368 of the APPS test set, identifying the leader of a chess game from the board.

## M APPS Decomposition Prompts and Evaluation Hyperparameters

We slightly loosen the requirements for Parsel programs generated by language models, treating redundant function definitions as references instead of raising errors. We sample everything with temperature=0.6, except the translations which we sample with temperature=0.2, a presence penalty of 0.1, and a logit bias to prevent it from generating the text “`def`”, as Codex has a tendency to degenerate to producing Python even when prompted with Parsel examples. We allow at most 500 tokens per function, but in practice found that they typically used less than half of them.

For evaluation, we use a timeout of 0.04 seconds per solution and evaluate at most 100,000 implementations per generated Parsel program.

For the Codex-only ablation, we allow it to generate at most 1000 tokens, in large part due to the rate limit. In particular, there is a heuristic rate limit that rejects any calls requesting more than 4,000 tokens. As a result, any larger number of samples per problem would prevent batching more than 3 samples at a time.

```
1 """An action plan is a list of strings that describes a sequence of steps to accomplish a
   ↳ task, To be correctly parsed, an action plan must be syntactically correct and contain
   ↳ only allowed actions and recognizable simple objects. Allowed actions: 'close' <arg1>, '
   ↳ cut' <arg1>, 'drink' <arg1>, 'drop' <arg1>, 'eat' <arg1>, 'find' <arg1>, 'grab' <arg1>, '
   ↳ greet' <arg1>, 'lie on' <arg1>, 'look at' <arg1>, 'open' <arg1>, 'plug in' <arg1>, 'plug
   ↳ out' <arg1>, 'point at' <arg1>, 'pour' <arg1> 'into' <arg2>, 'pull' <arg1>, 'push' <arg1>
   ↳ >, 'put' <arg1> 'on' <arg2>, 'put' <arg1> 'in' <arg2>, 'put back' <arg1>, 'take off' <
   ↳ arg1>, 'put on' <arg1>, 'read' <arg1>, 'release', 'rinse' <arg1>, 'run to' <arg1>, '
   ↳ scrub' <arg1>, 'sit on' <arg1>, 'sleep', 'squeeze' <arg1>, 'stand up', 'switch off' <arg1>
   ↳ >, 'switch on' <arg1>, 'touch' <arg1>, 'turn to' <arg1>, 'type on' <arg1>, 'wake up', '
   ↳ walk to' <arg1>, 'wash' <arg1>, 'watch' <arg1>, 'wipe' <arg1>. To satisfy the common-
   ↳ sense constraints, each action step in this action plan must not violate the set of its
   ↳ pre-conditions (e.g. the agent cannot grab milk from the fridge before opening it) and
   ↳ post-conditions (e.g. the state of the fridge changes from "closed" to "open" after the
   ↳ agent opens it)."""
2 #####
3 task_plan(): return a list of strings that represents an action plan to put a mug on the
   ↳ stall and bread on the desk.
4 -> "executable"
5 put_object_on(object, place): return a list of strings that represents an action plan to
   ↳ put an object in a place.
6 "mug", "stall" -> "executable"
```

Figure A.45: Full Parsel program including header for Fig. 2 example, with the ##### as the header separator. Note that we essentially just took the executability definition in [28] and added the list of available actions.

```

1 ""-----Solution-----
2
3 Propose a clever and efficient high-level solution for this problem. Consider all edge cases
  ↳ and failure modes.
4
5 Some common strategies include:
6 Constructive algorithms, Binary search, Depth-first search (DFS) and similar algorithms,
  ↳ Dynamic programming, Bitmasks, Brute force, Greedy algorithms, Graphs, Two pointers,
  ↳ Trees, Geometry, Graph matchings, Hashing, Probabilities, Data structures, Sortings,
  ↳ Games, Number theory, Combinatorics, Divide and conquer, Disjoint set union (DSU),
  ↳ Expression parsing
7
8 Write out your reasoning first, and then describe your high-level solution and explain why it
  ↳ is correct.
9 \"\"\"
10 Let's think step by step to come up with a clever algorithm.\"\"\"

```

Figure A.46: High-level sketch prompt for APPS programs

```

1 """-----Translation-----
2 # Here is an example calculating the probability of landing on the same character in a random shift of an input string, based on the following
  problem:
3 # Vasya and Kolya play a game with a string, using the following rules. Initially, Kolya creates a string s, consisting of small English letters, and
  ↳ uniformly at random chooses an integer k from a segment [0, len(s) - 1]. He tells Vasya this string s, and then shifts it k letters to the left
  ↳ , i.e. creates a new string t = s_k + is_k + 2... s_ns_is_2... s_k. Vasya does not know the integer k nor the string t, but he wants to guess
  ↳ the integer k. To do this, he asks Kolya to tell him the first letter of the new string, and then, after he sees it, open one more letter on
  ↳ some position, which Vasya can choose.
4 # Vasya understands, that he can't guarantee that he will win, but he wants to know the probability of winning, if he plays optimally. He wants you
  to compute this probability.
5 # Note that Vasya wants to know the value of k uniquely, it means, that if there are at least two cyclic shifts of s that fit the information Vasya
  ↳ knows, Vasya loses. Of course, at any moment of the game Vasya wants to maximize the probability of his win.
6 \n\n"
7 generate_cyclic_shifts(input_str): Calculates the average number of unique characters in the substrings of the input string that start with each
  ↳ character.
8 parse_input(input_str): Takes a string and returns the input string
9 compute_a_and_letter_pos(input_str): Generates the str_as_number_list and letter_pos lists. str_as_number_list is a list of integers that is used
  ↳ to store the character values of the input string. str_as_number_list is initialized as a list of 0s for twice the length of the input string.
  ↳ The values are calculated by taking the ASCII value of each character in the string and subtracting the ASCII value of the character 'a'.
10 compute_unique_characters(c, str_as_number_list, letter_pos) -> ans: Calculates the maximum number of unique characters in all substrings (for k=1
  ↳ to length) that start with the character represented by c. letter_pos is a list of lists, with each sublist containing the indices at which a
  ↳ character appears in the input string. str_as_number_list is a list of integers that is used to store the character values of the input string
11 compute_unique_characters_for_k(c, k, str_as_number_list, letter_pos): Create a counts list of zeros for each of the 26 alphabetical characters.
  ↳ For each i in the sublist of positions of letter_pos[c], increment counts at str_as_number_list[i + k]. Return the number of counts which
  ↳ are exactly one.
12 to_output_str(ans, input_str): Returns a string representation of ans divided by the length of the input string.
13 \n\n"
14 (6 lines)
15
16 # And here is an example identifying the largest binary number according to the following rules:
17 # The Little Elephant has an integer a, written in the binary notation. He wants to write this number on a piece of paper.
18 # To make sure that the number a fits on the piece of paper, the Little Elephant ought to delete exactly one any digit from number a in the binary
  ↳ record. At that a new number appears. It consists of the remaining binary digits, written in the corresponding order (possible, with leading
  ↳ zeroes).
19 # The Little Elephant wants the number he is going to write on the paper to be as large as possible. Help him find the maximum number that he can
  ↳ obtain after deleting exactly one binary digit and print it in the binary notation.
20 \n\n"
21 largest_binary_number(input_str): Returns the largest binary number that can be made by removing at most one digit from the input string.
22 parse_input(input_str): Takes a string and returns the input string
23 remove_zero(binary_str): Remove the first zero from the input string.
24 to_output_str(bigger_str): Returns the bigger string.
25 \n\n"
26 (4 lines)
27
28 # Here is an example of the format applied to identifying the winner of the following game:
29 # It is so boring in the summer holiday, isn't it? So Alice and Bob have invented a new game to play. The rules are as follows. First, they get a set
  ↳ of n distinct integers. And then they take turns to make the following moves. During each move, either Alice or Bob (the player whose turn is
  ↳ the current) can choose two distinct integers x and y from the set, such that the set doesn't contain their absolute difference |x - y|. Then
  ↳ this player adds integer |x - y| to the set (so, the size of the set increases by one).
30 # If the current player has no valid move, he (or she) loses the game. The question is who will finally win the game if both players play optimally.
  ↳ Remember that Alice always moves first.
31 \n\n"
32 identify_winner(input_str): Returns the winner of the game.
33 parse_input(input_str): Takes a string containing the length on the first line and the integers on the second and returns the list of integers
34 num_moves(l): The number of moves is the largest element in the list divided by the greatest common divisor of all elements in the list, minus the
  ↳ length of the list.
35 all_gcd(l): Returns the greatest common divisor of all elements in the list
36 to_output_str(num_moves): Returns the string 'Alice' if the number of moves is odd and 'Bob' if the number of moves is even
37 \n\n"
38 (5 lines)
39
40 # Limak is a little bear who loves to play. Today he is playing by destroying block towers. He built n towers in a row. The i-th tower is made of h_i
  ↳ identical blocks. For clarification see picture for the first sample.
41 # Limak will repeat the following operation till everything is destroyed.
42 # Block is called internal if it has all four neighbors, i.e. it has each side (top, left, down and right) adjacent to other block or to the floor.
  ↳ Otherwise, block is boundary. In one operation Limak destroys all boundary blocks. His paws are very fast and he destroys all those blocks at
  ↳ the same time.
43 # Limak is ready to start. You task is to count how many operations will it take him to destroy all towers.
44 \n\n"
45 destroy_towers(input_str): Returns the number of operations it takes to destroy all towers.
46 parse_input(input_str): Takes a string containing the number of towers on the first line and the heights of the towers on the second and returns
  ↳ the list of heights
47 side_ones(heights_list): From a list of ints, set the first and last elements to 1 and return the list
48 destroy_from_left(side_list): Copy the list and set each element to the minimum of itself and one more than the element to its left, starting
  ↳ from the second element
49 destroy_from_right(side_list): Copy the list and set each element to the minimum of itself and one more than the element to its right,
  ↳ starting from the second to last element
50 min_list(l1, l2): Return a list of the minimum of the corresponding elements of l1 and l2
51 to_output_str(min_list): Return the string representation of the maximum element in the list
52 \n\n"
53 (7 lines)
54
55 # Alex decided to go on a touristic trip over the country.
56 # For simplicity let's assume that the country has $n$ cities and $m$ bidirectional roads connecting them. Alex lives in city $s$ and initially
  ↳ located in it. To compare different cities Alex assigned each city a score $v_i$ which is as high as interesting city seems to Alex.
57 # Alex believes that his trip will be interesting only if he will not use any road twice in a row. That is if Alex came to city $v$ from city $u$, he
  ↳ may choose as the next city in the trip any city connected with $v$ by the road, except for the city $u$.
58 # Your task is to help Alex plan his city in a way that maximizes total score over all cities he visited. Note that for each city its score is
  ↳ counted at most once, even if Alex been there several times during his trip.
59 \n\n"
60 max_score(input_str): Simple function returning the maximum score Alex can get.
61 parse_input(input_str): Takes a string containing the number of cities and roads on one line, the scores of the cities on the next line, the roads
  ↳ on the next lines besides the last (1-indexed, make 0-indexed), and the starting city on the last line. It returns the city scores, the roads
  ↳ as an edge list, and the starting city.
62 get_neighbors(edges): Returns a dictionary of the neighbors of each city, defaulting to an empty set.
63 get_degrees_and_leaves(neighbors, root): Returns a dictionary of the degrees of each city, and a set of the leaves (excluding the root).
64 remove_leaves(scores, neighbors, degrees, leaves, root): Create a 0-initialized defaultdict of total_extra, and an int of max_extra. Pop leaves
  ↳ until it is empty. Update total_extra and max_extra based on the parent's total_extra vs the leaf's score plus its total_extra, whichever is
  ↳ greater. Return max_extra.
65 pop_leaf(neighbors, degrees, leaves, root): Pop off a leaf. Set parent to sole neighbor of the leaf and delete the leaf from the neighbors
  ↳ dictionary. Decrement the parent's degree. If the parent is not the root and has degree 1, add it to the leaves. Return the leaf and parent.
66 to_output_str(scores, neighbors, root, max_extra): Returns the string of the maximum score Alex can get. If the root isn't in neighbors, return the
  ↳ score of the root. Otherwise, this is the sum of the scores of the cities left in neighbors, plus the returned encountered max_extra.
67 \n\n"
68 (7 lines)
69
70 # Translate the following solution plan into the above format:
71 {solution_start}{solution_text}
72
73 TRANSLATE to Parsel.
74 \n\n"
75 """

```

Figure A.47: Translation prompt for APPS programs

## 778 **N HumanEval Prompts**

779 We use the same zero-shot prompt to encourage the high-level sketch as in APPS. For translation we  
780 use:

```
1 You will aim to solve the following problem in Parsel:
2 {question}
3
4 Translate the following solution plan into Parsel:
5 {solution_start}{solution_text}
6
7 You will translate a solution plan for a problem into Parsel. Each line should contain either
  ⇨ a function description or a function reference.
8
9 A function description should be of the form:
10 ```
11 function_name(arg1, arg2): Description of the function
12 ```
13
14 A function reference should be of the form:
15 ```
16 function_name
17 ```
18
19 Use indentation to indicate dependencies between functions. For example, if function A calls
  ⇨ function B, then function B should be indented under function A.
20 Make sure that the top-level function matches the name of the function in the solution plan.
```

Figure A.48: Translation prompt for GPT-4

## O Robotic Plan Evaluation Details

### O.1 Questionnaire

Our questionnaire closely follows that of Huang et al. [28]. We provide a figure with the directions for the accuracy version of the survey in the first image of Fig A.49. We include an example question in the second image. Note that each participant was shown a random 5 questions with their answers in random order. The clarity survey instead asks “For every question below, evaluate how easy it is to understand how the provided steps accomplish the task. Please rank the planned steps for each question from most understandable to least understandable (with 1 as the best and 3 as the worst).” In addition, for the clarity survey, each question text instead said “Rank the following plans based on which is the most understandable (1 = most understandable, 3 = least understandable).”

### O.2 Executability

We find that the automated executability check is a less insightful metric than human evaluation, as it doesn’t meaningfully reflect the plan’s likelihood of successfully completing a task. Unfortunately, the code to replicate the executability measure from Huang et al. [28] is unavailable. As an alternative, we developed our own executability checker using example code found on VirtualHome’s GitHub repository, which evaluates if a proposed plan is syntactically accurate and can be executed within the VirtualHome environment. By leveraging Codex to generate eight Parsel programs for each of the 88 tasks and subsequently compiling them using the Parsel compiler, our method successfully produced executable solutions for all tasks. Conversely, Huang et al. [28] managed executable plans for only 86 tasks. However, it is worth noting that our Parsel compiler explicitly incorporates this executability measure as a constraint, which explains the higher executability rates observed in our approach.

On the next (and only) survey page, you will be presented with 5 questions.

For each question you will see an everyday task and a plan to accomplish it. Please determine whether the task can be completed using the provided steps. In other words, can the task be decomposed into these steps? Note that simply restating the task does not mean completing it. Please rank the planned steps for each question from most accurate to least accurate (with 1 as the best and 3 as the worst).

There is no correct answer to each question. Please just use your first intuition to determine the answers.

Rank the following plans based on how accurately they accomplish the task (1 = most accurate, 3 = least accurate):

|                                                                                                                                                                                                                                                                                                                                                                                                                                                                              | 1                     | 2                     | 3                     |
|------------------------------------------------------------------------------------------------------------------------------------------------------------------------------------------------------------------------------------------------------------------------------------------------------------------------------------------------------------------------------------------------------------------------------------------------------------------------------|-----------------------|-----------------------|-----------------------|
| <b>Task: Wash teeth</b><br>walk to bathroom<br>walk to sink<br>find faucet<br>switch on faucet<br>find toothbrush<br>grab toothbrush<br>find toothpaste<br>grab toothpaste<br>put toothpaste on toothbrush<br>put back toothpaste<br>grab toothbrush<br>wash teeth<br>rinse toothbrush<br>switch off faucet<br>grab toothbrush<br>find toothbrush holder<br>put toothbrush on toothbrush holder<br>grab toothbrush<br>put toothbrush on toothbrush holder<br>walk to bedroom | <input type="radio"/> | <input type="radio"/> | <input type="radio"/> |
| <b>Task: Wash teeth</b><br>task_plan:<br>wash_teeth:<br>find toothbrush<br>plug in sink<br>pour water into sink<br>pour toothpaste into toothbrush<br>scrub teeth with toothbrush<br>pour water into toothbrush<br>rinse toothbrush<br>plug out sink<br>drop toothbrush<br>find towel<br>wipe teeth with towel<br>drop towel                                                                                                                                                 | <input type="radio"/> | <input type="radio"/> | <input type="radio"/> |
| <b>Task: Wash teeth</b><br>find toothbrush<br>walk to toothbrush<br>grab toothbrush<br>open toothbrush<br>grab toothbrush<br>find bathroom sink, walk to bathroom sink<br>grab toothbrush<br>run to bathroom sink<br>put toothbrush on bathroom sink<br>release toothbrush<br>put back toothbrush<br>walk to toothbrush                                                                                                                                                      | <input type="radio"/> | <input type="radio"/> | <input type="radio"/> |

Figure A.49: Screenshot of survey directions and example survey question. In this figure, the first answer was generated by the baseline, the second was the indented Parsel version, and the third was the unindented Parsel version. However, note that the order is randomized for each participant.

```

1 main(input_string): Takes an input line. First, splits it at newline, and stores the second
  ↳ line in a variable s and the third in t. Splits s in two parts at the asterisk, and
  ↳ checks whether the string t starts with the first part of s and ends with the second
  ↳ part. Returns the string "YES" if that condition is met, otherwise "NO". Also, it should
  ↳ always return "NO" if the length of t is smaller than the sum of the length of the
  ↳ parts of s.
2 "6 10\ncode*s\ncodeforces" -> "YES"
3 "6 10\ncodeforces\ncodeforces" -> "YES"
4 "6 10\ncode*morces\ncodeforces" -> "NO"
5 "6 10\na*a\na" -> "NO"
6 "6 10\na*a\naa" -> "NO"

```

Figure A.50: Solution to <https://codeforces.com/problemset/problem/1023/A>

```

1 main(input_string): Parses the input and returns the minimum area of the input.
2 "3\n10 1\n20 2\n30 3" -> 180
3 "3\n3 1\n2 2\n4 3" -> 21
4   parse_input(input_string): Takes the input line and first splits on newline. Ignores the
  ↳ first line, and parses each of the remaining lines as a tuple of two numbers, which
  ↳ give a list L of tuples. Returns L.
5   "3\n10 1\n20 2\n30 3" -> [[10, 1], [20, 2], [30, 3]]
6   parse_line(l): Splits l on space, converts each element to int, and returns the result
  ↳ of converting the result to a list.
7   "10 1" -> [10, 1]
8   enumerate_subsets_at_most_k(L, k): Returns all subsets of L with sizes ranging from 0 to
  ↳ k, inclusive.
9   [1, 2, 3], 2 -> [[], [1], [2], [3], [1, 2], [1, 3], [2, 3]]
10  enumerate_subsets(L, k): recursively enumerates the subsets of size k of the list L.
  ↳ Base cases: if k = 0, returns a list containing the empty list. If k > len(L),
  ↳ returns the empty list. Otherwise, first construct the subsets that contain the
  ↳ first element, then those that do not, and return their concatenation.
11  [1, 2, 3], 2 -> [[1, 2], [1, 3], [2, 3]]
12  minimum_area(whs): First, calls enumerate_subsets_at_most_k passing whs and half the
  ↳ length of whs rounded down. Returns the minimum result of calling compute_area on the
  ↳ list given by apply_inversions with whs and the subset.
13  [[10, 1], [20, 2], [30, 3]] -> 180
14  [[3, 1], [2, 2], [4, 3]] -> 21
15  enumerate_subsets_at_most_k
16  compute_area(whs): takes a list of pairs (width, height). Computes the sum of the
  ↳ widths and the maximum of the heights. Returns the product of those two numbers.
17  [[1, 2], [3, 5]] -> 20
18  [[10, 1], [20, 2], [30, 3]] -> 180
19  apply_inversions(whs, subset): Takes a list of pairs of form (w, h) and a subset of
  ↳ indices to invert. Returns a list where the elements of whs whose index is in the
  ↳ subset are inverted to (h, w), and the others appear as given.
20  [[1, 2], [3, 5]], [1] -> [[1, 2], [5, 3]]
21  [[1, 2], [3, 5]], [] -> [[1, 2], [3, 5]]

```

Figure A.51: Solution to <https://codeforces.com/problemset/problem/529/B>

```

1 main(input): Converts the input to an integer and returns the value of f of n.
2 "1" -> 1
3 "2" -> 3
4 "3" -> 10
5 f(n): First pre-computes the Pascal triangle up to n+1 using compute_pascal_triangle.
    ↪ Then, returns the value of dp(n, pascal_triangle)
6 1 -> 1
7 2 -> 3
8 3 -> 10
9 compute_pascal_triangle(N): returns a matrix with N + 1 rows where m[i][j] corresponds
    ↪ to "i choose k", i.e., the Pascal triangle. It is computed using dynamic
    ↪ programming: m[i][j] = m[i-1][j] + m[i-1][j-1]. All elements are modulo (10**9 +
    ↪ 7). The i-th row has only i columns.
10 2 -> [[1], [1, 1], [1, 2, 1]]
11 3 -> [[1], [1, 1], [1, 2, 1], [1, 3, 3, 1]]
12 dp(n, pascal_triangle): first creates a list with (n + 1) zeros called L. Then fills
    ↪ it in with the following dynamic programming relation: base case is L[0] = 1;
    ↪ then, L[i] = sum (j in [1, i]) pascal_triangle[i-1][j-1] * L[i - j]. Finally,
    ↪ returns the following answer: sum (k in [1, n]) pascal_triangle[n][k] * L[n - k].
    ↪ After each of these assignments, take modulo 10**9 + 7 to avoid big numbers.
13 1, [[1], [1, 1], [1, 2, 1]] -> 1
14 2, [[1], [1, 1], [1, 2, 1]] -> 3
15 3, [[1], [1, 1], [1, 2, 1], [1, 3, 3, 1]] -> 10

```

Figure A.52: Solution to <https://codeforces.com/problemset/problem/568/B>

```

1 main(input): Reads the input line and counts how many pairs of elements pass the test.
2 "4 2\n2 3\n1 4\n1 4\n2 1" -> 6
3 "8 6\n5 6\n5 7\n5 8\n6 2\n2 1\n7 3\n1 3\n1 4" -> 1
4 parse_input(input): Splits input as a sequence of lines. Each line is parsed as a list of
    ↪ two space-separated integers. The first line of input contains N and P, and the
    ↪ second to last lines are aggregated in a list L. Returns a list with three values: N,
    ↪ P and L.
5 "4 2\n2 3\n1 4\n1 4\n2 1" -> [4, 2, [[2, 3], [1, 4], [1, 4], [2, 1]]]
6 count_valid_pairs(L, p): for each distinct pair (i, j) both ranging from 0 to the length
    ↪ of L, counts how many of those pairs have score at least p in L given by
    ↪ compute_pair_score.
7 [[2, 3], [1, 4], [1, 4], [2, 1]], 2 -> 6
8 [[5, 6], [5, 7], [5, 8], [6, 2], [2, 1], [7, 3], [1, 3], [1, 4]], 6 -> 1
9 compute_pair_score(a, b, L): receives two integers, a and b, and a list of pairs L.
    ↪ Returns how many elements of L contain either a + 1 or b + 1.
10 1, 2, [[2, 3], [1, 4], [1, 4], [2, 1]] -> 2
11 1, 1, [[2, 3], [1, 4], [1, 4], [2, 1]] -> 2
12 0, 1, [[2, 3], [1, 4], [1, 4], [2, 1]] -> 4
13 4, 5, [[2, 3], [1, 4], [1, 4], [2, 1]] -> 0

```

Figure A.53: Solution to <https://codeforces.com/problemset/problem/420/C>

```

1 main(input): parses the input as two space-separated integers, n and m. Return 2 * f(n, m)
    ↪ modulo 10**9 + 7
2 "2 3" -> 8
3 "3 2" -> 8
4     f(n, m): computes fib(n) + fib(m) - 1
5     2, 3 -> 4
6         fib(m): computes the m-th fibonacci number modulo 10**9 + 7 using dynamic programming
    ↪ starting with dp[0] = 1 and dp[1] = 1, then dp[n] = (dp[n-1] + dp[n-2]) % (10**9 +
    ↪ 7)
7     1 -> 1
8     2 -> 2
9     3 -> 3
10    4 -> 5
11    5 -> 8
12    6 -> 13

```

Figure A.54: Solution to <https://codeforces.com/problemset/problem/1239/A>

## Q Parsel Language Nuances

### Q.1 Syntax

**Descriptions.** A function description is represented as a function name followed by comma-separated input arguments in parentheses, and optionally an arrow followed by what the function returns<sup>4</sup>, then a colon and text describing the function to be implemented. For example, as part of Conway’s Game of Life, one might write

```
count_living_neighbors(grid, i, j): count the number of living neighbors of the cell at the  
↪ index (i, j)
```

A function generated from a description can call either the functions defined directly below the description in the function graph (indicated with indentation) or references directly below the description<sup>5</sup>, both shown in Fig. ii.

**Constraints.** A constraint is represented as a function’s input values comma-separated, optionally followed by an arrow and the expected output of the function. Constraints are provided at the same indentation as the preceding description. For example, after the definition of `count_living_neighbors` one can write

```
[[1, 0], [0, 1]], 0, 0 -> 1  
[[1, 0], [0, 1]], 0, 1 -> 2
```

This indicates that `count_living_neighbors` should return 1 when called with the arguments `[[1, 0], [0, 1]], 0, 0` and 2 when called with `[[1, 0], [0, 1]], 0, 1`. Notably, to apply complex constraints on functions, one can describe and constrain higher-order functions. For example:

```
type_fn_output(fn, args): returns the type of the output of a function called with args  
count_living_neighbors, ([[1, 0], [0, 1]], 0, 0) -> int
```

This indicates that the function `count_living_neighbors` should return an integer when called with the input arguments `[[1, 0], [0, 1]], 0, 0`.

What it means to satisfy constraints to validate a program varies from language to language: in Python, one can check that a program passes certain assert statements by evaluating them; however, in a theorem-proving language like Lean, where the ability to run a program (without skipping steps by using `sorry` or `oops` lines) shows that a proof holds, one would instead represent the formal proof statement as the specified constraint (that is, that you are actually proving what you set out to prove). For languages where correctness can be checked without any unit tests, their functions can be treated as also having implicit constraints.

**References.** A reference is simply the name of a function defined in the current scope (see the next paragraph for details) within the function graph. A reference allows and encourages (via prompt) the parent function to use the referenced function. This allows for recursive function definitions and functions called by multiple functions. For example, one can define an (overly verbose) version of the Collatz conjecture (a well-known recursive open question in mathematics) as shown in Figure ii, where the final line is a reference. We visualize the corresponding call graph and its strongly connected components (SCC) in Figure ???. In the Collatz functions, `base_case` is implemented first as the `collatz_recursion` SCC depends on it.

### Q.2 Headers

We also support program headers, allowing global contexts, used when implementing all new functions within a program. This is indicated by a line containing an optional string of special characters (e.g. “`#####`”) separating the body and the text and is passed as a prefix to all prompts.

<sup>4</sup>Note that in Parsel, for Python one can also indicate in the description that a function should yield a value or is a generator.

<sup>5</sup>A nuance here is the optional ability for undefined/out-of-scope functions which are generated by the code LLM to also be implemented automatically.

### 846 **Q.3 Repeated Automatic Decomposition**

847 As indicated by a rapidly growing number of papers [10, 28], the task of decomposing a task into  
848 steps in natural language is one that language models are surprisingly capable of. As explored in  
849 concurrent work [57], using language models to automatically and recursively decompose difficult  
850 open-ended problems to arbitrary depth is a powerful tool. Thus, we treat the ability to automatically  
851 decompose a Parsel function as a key feature of Parsel. This is an optional flag that prompts a  
852 language model to generate Parsel code corresponding to any additional subfunctions necessary when  
853 Parsel fails to implement a function. These proposed subfunctions are then added as child nodes to  
854 the decomposed function node. However, an additional consequence is that Parsel can thus be used to  
855 recursively decompose tasks into steps, by repeatedly identifying descriptions that cannot be directly  
856 implemented and attempting to decompose them.

### 857 **Q.4 Scope.**

858 Scope in Parsel is defined by indentation. The scope  $S$  of a function  $f$  includes the set of functions  
859 that can be used as a reference for a given function – that is, all functions where the indentations  
860 between the current function to the referenced function are strictly decreasing.

### 861 **Q.5 Variations due to target language requirements.**

862 Certain aspects of the implementation are still target-language specific. As discussed above, the  
863 meaning and representation of a constraint may vary by language. Moreover, every language has a  
864 different evaluation function: executing Python is different than compiling and running C++ code,  
865 which is different than checking a proof with Lean. Further, every language will likely require a  
866 different prompt for the language model. Thus, we detail these particularities in language-specific  
867 configuration files.

```

1 Question:
2 The grand museum has just announced a large exhibit on jewelry from around the world. In the
  ↳ hopes of his potential future prosperity, the world-renowned thief and master criminal
  ↳ Edward Terrenando has decided to attempt the magnum opus of his career in thievery.
3
4 Edward is hoping to purloin a large number of jewels from the exhibit at the grand museum.
  ↳ But alas! He must be careful with which jewels to appropriate in order to maximize the
  ↳ total value of jewels stolen.
5
6 Edward has $k$ knapsacks of size $1$, $2$, $3$, up to $k$, and would like to know for each
  ↳ the maximum sum of values of jewels that can be stolen. This way he can properly weigh
  ↳ risk vs. reward when choosing how many jewels to steal. A knapsack of size $s$ can hold
  ↳ items if the sum of sizes of those items is less than or equal to $s$. If you can figure
  ↳ out the best total value of jewels for each size of knapsack, you can help Edward pull
  ↳ off the heist of the century!
7
8 -----Input-----
9 Each input will consist of a single test case. Note that your program may be run multiple
  ↳ times on different inputs. The first line of input will consist of two space-separated
  ↳ integers $n$ and $k$, where $n$ ($1 \le n \le 1000000$) is the number of jewels in the
  ↳ exhibit, and $k$ ($1 \le k \le 100000$) is the maximum size of knapsack available to
  ↳ Edward. The next $n$ lines each will describe a jewel. Each line will consist of two
  ↳ space-separated integers $s$ and $v$, where $s$ ($1 \le s \le 300$) is the size of the
  ↳ jewel, and $v$ ($1 \le v \le 10^9$) is its value. Each jewel can only be taken once per
  ↳ knapsack, but each knapsack is an independent problem.
10
11 -----Output-----
12 Output $k$ integers separated by whitespace. The first integer should be the maximum value of
  ↳ jewels that will fit in a knapsack of size $1$. The second should be the maximum value
  ↳ of jewels in a knapsack of size $2$, and so on.
13
14 -----Examples-----
15 Sample Input 1:
16 4 9
17 2 8
18 1 1
19 3 4
20 5 100
21 Sample Output 1:
22 1 8 9 9 100 101 108 109 109
23
24 Sample Input 2:
25 5 7
26 2 2
27 3 8
28 2 7
29 2 4
30 3 8
31 Sample Output 2:
32 0 7 8 11 15 16 19

```

Figure A.55: Pipeline Figure Task

```
1 First, we need to figure out how to calculate the maximum sum of values of jewels for each
  ↳ size of knapsack. To do this, we can use a dynamic programming approach.
2
3 We can create a two-dimensional array of size  $n \times k$  where each row represents the
  ↳ different jewels and each column represents the different sizes of knapsack. The value
  ↳ of each cell in the array will represent the maximum sum of values of jewels that can be
  ↳ stolen for a given knapsack size.
4
5 We can then iterate through the array, starting at the beginning. For each row, we can
  ↳ calculate the maximum sum of values of jewels that can be stolen for each knapsack size
  ↳ by taking the maximum of the value of the current cell and the value of the previous
  ↳ cell plus the value of the current jewel.
6
7 At the end, we will have an array that contains the maximum sum of values of jewels that can
  ↳ be stolen for each knapsack size. We can then output these values as our answer.
8
9 This algorithm is correct because we are calculating the maximum sum of values of jewels that
  ↳ can be stolen for each knapsack size by comparing the values of the current cell and
  ↳ the previous cell plus the value of the current jewel. This ensures that we are taking
  ↳ the maximum value for each knapsack size.
```

Figure A.56: Pipeline Figure Sketch

```

1 # Takes a string containing the number of jewels and knapsack sizes on the first line, the
  ↳ jewels on the next lines, and returns the number of jewels, the knapsack sizes, and the
  ↳ jewels.
2 def parse_input(input_str):
3     lines = input_str.split('\n')
4     first_line = lines[0].split(' ')
5     num_jewels = int(first_line[0])
6     knapsack_sizes = int(first_line[1])
7     jewels = [[0, 0]] * num_jewels
8     for i in range(1, num_jewels + 1):
9         jewel = lines[i].split(' ')
10        jewels[i - 1] = [int(jewel[0]), int(jewel[1])]
11    return num_jewels, knapsack_sizes, jewels
12
13 # Returns the maximum sum of values of jewels that can be stolen for each knapsack size.
14 def max_sum_of_jewels_for_size_and_jewel(jewels, size, jewel):
15     if size < 0:
16         return 0
17     elif jewel < 0:
18         return 0
19     elif jewel == 0:
20         return jewels[jewel][1] if jewels[jewel][0] <= size else 0
21     elif jewels[jewel][0] > size:
22         return max_sum_of_jewels_for_size_and_jewel(jewels, size, jewel-1)
23     else:
24         return max(max_sum_of_jewels_for_size_and_jewel(jewels, size, jewel-1),
25                    max_sum_of_jewels_for_size_and_jewel(jewels, size-jewels[jewel][0], jewel-1)
26                    ↳ + jewels[jewel][1])
27
28 # Returns the maximum sum of values of jewels that can be stolen for each knapsack size.
29 def max_sum_of_jewels_for_size(jewels, size):
30     result = []
31     for s in range(1, size + 1):
32         result += [max_sum_of_jewels_for_size_and_jewel(jewels, s, len(jewels) - 1)]
33     return result
34
35 # Returns the string of the maximum sum of values of jewels that can be stolen for each
  ↳ knapsack size.
36 def to_output_str(max_sum_of_jewels_for_size):
37     return " ".join(map(str, max_sum_of_jewels_for_size))
38
39 # Returns the maximum sum of values of jewels that can be stolen for each knapsack size.
40 def max_sum_of_jewels(input_str):
41     '''
42     >>> max_sum_of_jewels('4 9\n2 8\n1 1\n3 4\n5 100\n')
43     '1 8 9 9 100 101 108 109 109'
44     >>> max_sum_of_jewels('5 7\n2 2\n3 8\n2 7\n2 4\n3 8\n')
45     '0 7 8 11 15 16 19'
46     '''
47     number_of_jewels, knapsack_sizes, jewels = parse_input(input_str)
48     return to_output_str(max_sum_of_jewels_for_size(jewels, knapsack_sizes))
49
50 assert compare_output(max_sum_of_jewels, '4 9\n2 8\n1 1\n3 4\n5 100', '1 8 9 9 100 101 108
  ↳ 109 109')
51 assert compare_output(max_sum_of_jewels, '5 7\n2 2\n3 8\n2 7\n2 4\n3 8', '0 7 8 11 15 16 19')
52 assert compare_output(max_sum_of_jewels, '2 6\n300 1\n300 2', '0 0 0 0 0 0')

```

Figure A.57: Pipeline Figure Sketch

## 869 S Other Details

### 870 S.1 Test Generation in HumanEval

871 For our test generation in our HumanEval experiments, we generated a set of tests by prompting GPT-  
872 4 to "Generate an assert-based test for the following function. Answer with only a code block,  
873 and no other text. Do not wrap your asserts in a function.\n" + question and then collecting  
874 and set-aggregating 100 completions.

### 875 S.2 Backtracking

876 We also support backtracking for the Parsel implementation step, where we re-implement descendants  
877 by sampling new solutions for dependencies if a correct solution is not found for a parent. This is  
878 necessary to improve the robustness of some of the Appendix examples such as Figure A.14.

### 879 S.3 Training Details

880 Although we do not train any models, all models used are discussed throughout the paper. See  
881 Appendix M for more details about sampling hyperparameters.

### 882 S.4 Error Bars

883 We estimate a standard deviation of  $\pm 1.4\%$  for the best APPS result, given 1000 sampled problems.

### 884 S.5 Compute

885 The most computationally intensive part of this research, by far (in terms of FLOPS), was the ablation  
886 using an open-source CodeGen model, which required several-hundred A100 hours. The rest of the  
887 inference was done through API calls.

### 888 S.6 Generated Tokens

889 For the APPS evaluation, in terms of tokens generated, it is hard to compare the models directly: The  
890 CodeT paper does not specify the number of tokens decoded for their evaluation. Without more detail  
891 about their evaluations, it is impossible to confidently estimate the tokens generated per program for  
892 the CodeT evaluation. The AlphaCode results sample at most 768 tokens per solution, but they do  
893 not report average statistics directly - based on Figure 11 in the AlphaCode paper [35], the majority  
894 of its generated solutions are 150 to 350 tokens long after removing dead code and comments. The  
895 competition-level problems (that we evaluate on) require more tokens on average. For their best  
896 reported results, their figures indicate they sample at least 20 billion tokens for the competition-level  
897 subset of APPS. On the other hand, for our best results, Parsel generates (on average) 491 tokens  
898 of Python code per program implementation, and because we implement each high-level sketch in  
899 Python sixteen times (i.e.  $k = 16$  in our best  $n \times k$ ), we also sample on average 22 sketch tokens and  
900 43 translation tokens per Python program implementation. Correspondingly, we sample roughly 7  
901 million tokens for our APPS evaluation.

### 902 S.7 Reproducibility

903 While our contribution is not a model or dataset, we have released our code.
